# Supplementary material for: Targeting p75NTR activity alleviates the neurotoxic effect of high glucose on iPSC-derived dopaminergic neurons
Source: Stem Cell Res Ther. 2026 Mar 21;17:161. doi: 10.1186/s13287-026-04965-y (PMC13126899; doi:10.1186/s13287-026-04965-y)
Supplement: Supplementary file 2 — Supplementary Material 2. Table S1. Annotation of Heatmap rows. [file 13287_2026_4965_MOESM2_ESM.xlsx]

## Sheet: Sheet1
Id	norm.20mM_n.10	norm.20mM_n.11	norm.20mM_n.12	norm.100mM_n.11	norm.100mM_n.12	log2FoldChange	padj
LINC00261	3	0	0	12	10	6.435	0.0130497
RPS17	55	172	39	2410	1005	4.233	5.0521e-16
EEF1D	25	13	5	645	15	4.1	0.000209544
PHF1	13	2	8	199	17	3.489	0.0377776
PPP1R17	19	2	2	25	17	3.28	0.0239713
BEST3	21	3	2	24	24	3.183	0.0193235
NEUROG2	9	3	2	41	12	3.157	0.0275853
MIF	137	29	20	163	245	3.034	1.82018e-05
SLC7A8	17	2	10	19	81	3.007	0.00700613
LSM14A	55	8	7	87	27	2.685	0.011477
NEUROG1	61	17	7	123	37	2.615	0.00468995
HSPA2	7	9	6	45	38	2.521	0.0236044
CDC45	30	18	5	69	45	2.508	0.0154896
B9D1	10	8	6	43	38	2.486	0.0251047
COL1A1	21	29	3	125	24	2.434	0.0176361
CCL2	4	8	19	111	45	2.431	0.0422405
CD9	11	9	17	89	50	2.396	0.0240014
FOXN4	46	36	20	173	115	2.379	0.00226488
PIF1	51	26	6	106	46	2.372	0.0121917
IGFBP7	20	26	3	116	19	2.362	0.0236044
FAM64A	68	34	21	129	141	2.326	0.00452469
CENPA	12	12	6	56	36	2.304	0.0345421
CFAP126	51	20	10	93	53	2.282	0.0140427
S1PR3	18	12	13	89	42	2.263	0.0275853
FOXJ1	65	82	94	457	387	2.261	7.28626e-05
KIF20A	29	15	25	139	60	2.223	0.034816
BVES	13	12	6	51	33	2.181	0.0495555
CNN1	17	25	15	134	52	2.144	0.0193108
CD58	44	31	13	113	71	2.125	0.0180924
ACSBG1	44	18	17	79	74	2.108	0.0222001
TRIM5	37	29	17	129	68	2.084	0.017008
ACTA2	170	225	77	686	461	2.08	0.000338034
TNS3	13	19	14	66	68	2.035	0.0371307
IFIT1	101	43	13	140	66	1.997	0.0193108
CCNB1	106	52	51	233	181	1.993	0.00595091
SPSB4	226	183	106	1104	255	1.945	0.00278875
LGI2	141	90	101	147	887	1.943	0.034816
DEPDC1B	31	26	16	106	55	1.932	0.0399285
MYRF	18	29	12	123	41	1.929	0.0459053
CCNB2	137	80	43	290	170	1.92	0.00666312
KLHL1	8	13	38	73	104	1.91	0.0469082
RRM2	191	118	50	395	188	1.829	0.00595091
TP53I3	57	38	28	204	66	1.826	0.0441892
KIF2C	37	37	34	143	110	1.822	0.0279717
ACAT2	1560	269	347	858	1302	1.791	0.0021341
TPM2	82	63	17	213	58	1.78	0.0326443
CDCA5	32	56	20	188	71	1.771	0.0362032
EPPK1	57	45	18	135	72	1.761	0.0442687
EFS	57	76	17	212	69	1.732	0.0399285
TYMS	140	160	115	618	327	1.73	0.0039812
TAGLN	169	369	204	1663	468	1.691	0.00851281
E2F2	65	73	25	183	103	1.671	0.0450578
FLJ16779	178	108	22	228	111	1.66	0.0492042
TEAD2	482	411	122	1157	409	1.615	0.00569802
BIRC5	217	122	61	338	206	1.612	0.0180924
CSRP2	155	146	76	405	257	1.611	0.0128536
GJA1	245	172	119	498	376	1.597	0.00678596
INSM1	135	174	212	853	397	1.597	0.0222963
CTGF	93	215	248	1200	399	1.584	0.0415309
ARHGAP31	96	90	41	304	103	1.55	0.0452058
SAPCD2	129	77	54	248	142	1.537	0.0449493
CALR	1309	833	866	3757	1614	1.536	0.0441892
PLK1	259	216	112	788	250	1.517	0.0135638
UBE2C	289	278	138	811	378	1.501	0.00832467
NPTX2	150	100	81	316	202	1.493	0.0410632
FRZB	190	108	62	311	167	1.477	0.0433553
SCARA3	292	216	80	495	270	1.467	0.0217318
TTYH2	126	108	94	308	251	1.462	0.0415309
MVK	389	77	106	229	270	1.456	0.0311597
FDFT1	1547	423	483	1138	1312	1.436	0.0208431
TPX2	348	194	100	426	329	1.421	0.0263536
MEST	212	239	335	942	593	1.399	0.0423946
GPC4	260	281	164	694	459	1.392	0.0186754
CYP51A1	776	351	611	1145	1258	1.372	0.0367376
COL27A1	395	307	135	540	514	1.365	0.0441892
CNN2	787	864	371	2361	875	1.345	0.0368058
SNRPA	340	238	122	569	329	1.343	0.0275853
FDPS	1519	369	374	725	1189	1.322	0.0459936
TACC3	533	406	288	877	812	1.303	0.0415309
ITGB5	378	388	191	778	563	1.28	0.0415309
PTTG1	576	446	200	1038	495	1.262	0.0441892
FOXP1	532	567	606	252	259	-1.199	0.0484388
HIST1H1C	316	466	485	185	221	-1.237	0.0442687
N4BP2	557	546	687	174	347	-1.315	0.0385849
SLC16A9	267	453	496	178	202	-1.321	0.0301546
RBBP8	191	415	500	140	234	-1.33	0.0371307
TXLNG	471	573	655	237	248	-1.339	0.0240139
PRICKLE1	324	483	385	154	178	-1.38	0.0286109
FAM184A	541	552	574	151	307	-1.383	0.034816
FBXO25	389	350	365	105	177	-1.387	0.0351207
C1orf27	371	481	575	115	342	-1.396	0.0484388
RBM27	1006	1066	1432	263	812	-1.412	0.0492042
RBM12B	354	280	443	81	213	-1.415	0.0326443
DNAJC21	429	426	491	101	285	-1.417	0.0459936
NUMA1	2344	3210	2168	1016	959	-1.418	0.0388752
SETD2	1152	1432	1370	389	692	-1.43	0.036394
CCDC66	759	1044	1022	263	552	-1.436	0.0399285
JMJD1C	855	1049	1123	250	634	-1.443	0.0459936
CHAC1	220	5706	4726	1604	2264	-1.446	0.0399285
ASNS	984	4902	4165	2085	1313	-1.449	0.0316438
LRIF1	614	638	927	183	425	-1.461	0.0218332
MAP7D2	485	648	880	253	295	-1.466	0.0126899
URI1	1066	1343	1126	321	606	-1.476	0.0378982
MEGF9	443	341	312	78	171	-1.484	0.0399285
NOS1AP	225	397	325	102	160	-1.488	0.0281742
NSD1	678	770	711	206	334	-1.496	0.0202406
TIMM44	287	601	697	176	297	-1.498	0.0111381
LTN1	498	562	639	154	289	-1.499	0.0126899
UHRF1BP1L	259	221	276	58	128	-1.511	0.0413003
BNC2	534	222	191	73	72	-1.513	0.0234776
SHMT2	237	2167	2008	923	575	-1.517	0.0193108
SHOX2	11676	8871	10270	2148	5106	-1.527	0.0416484
WARS	393	1277	1511	577	392	-1.546	0.0160172
YARS	369	2636	2425	1105	668	-1.556	0.0180924
SH3BP5	1331	1589	1603	318	907	-1.568	0.0422405
CEP350	1478	1694	1778	325	1031	-1.58	0.0478434
TET2	1338	1492	1098	276	645	-1.596	0.0422405
LARS	789	1564	1830	520	598	-1.602	0.00739311
N4BP2L2	1270	1667	2019	433	819	-1.621	0.0126899
CADM2	931	1389	1300	308	614	-1.624	0.0157082
RNPC3	535	550	472	109	247	-1.625	0.0182477
DNAH14	269	267	302	52	155	-1.634	0.0345421
SEC31A	768	802	772	139	456	-1.634	0.0399285
SNHG1	779	3042	2703	1010	837	-1.641	0.00964129
WDR70	289	340	361	55	220	-1.641	0.0459936
TRIM66	203	1218	1007	343	356	-1.663	0.0046799
SARS	1321	3575	3333	993	1191	-1.666	0.00890059
UTP23	263	293	340	56	168	-1.679	0.0249465
TCEA1	336	452	569	112	219	-1.69	0.00453275
IFT74	177	141	187	30	79	-1.705	0.0368058
JPH4	984	1098	1279	241	537	-1.715	0.00700613
CNTNAP5	217	194	340	30	187	-1.719	0.0442687
GPATCH8	1672	1853	2067	300	1144	-1.734	0.034816
ZNF462	1326	1347	1333	196	801	-1.747	0.041062
BEND6	88	184	395	66	98	-1.751	0.0135638
ESF1	630	696	876	124	423	-1.759	0.0121917
FAM13C	350	505	350	80	182	-1.79	0.0176361
SLC7A5	110	2229	1624	850	354	-1.792	0.0046799
SMC3	2651	2903	2791	386	1709	-1.804	0.0499043
KLF3	369	528	578	89	274	-1.807	0.00832467
NOC3L	129	147	161	32	58	-1.817	0.0249465
CACNG2	237	219	261	32	134	-1.821	0.0371307
KPNA5	486	491	452	62	271	-1.83	0.0329809
LOC441204	220	290	288	61	106	-1.84	0.00710752
ANKRD36	712	462	506	60	289	-1.85	0.0249465
LOC440910	61	91	84	18	31	-1.858	0.0449493
SCYL2	787	839	822	99	513	-1.862	0.0416484
JMY	599	719	751	114	350	-1.867	0.00700613
NCOA7	562	960	1250	204	435	-1.875	0.00178899
DHX36	2188	2037	2196	240	1352	-1.886	0.048416
CFAP43	37	65	133	18	34	-1.898	0.0329809
EIF4EBP1	60	510	431	129	123	-1.899	0.00093343
LINC00324	183	109	389	39	79	-1.912	0.00922946
PYCR1	355	1423	1301	300	433	-1.914	0.00124327
PHGDH	287	3136	2855	1042	595	-1.925	0.0025741
TAF13	78	104	106	15	47	-1.931	0.0459936
LOC728730	44	84	83	20	23	-1.937	0.0326443
RNF115	690	730	862	85	485	-1.942	0.0252476
MBD5	463	387	332	41	198	-1.944	0.0345421
ZFYVE9	278	376	417	50	196	-1.959	0.00922946
ZMAT1	558	703	723	77	417	-1.967	0.0249465
SYCP2	103	179	199	22	97	-1.976	0.0368058
SYNE1	599	666	743	100	310	-1.983	0.00353124
SMC6	871	912	899	90	563	-1.987	0.0415309
ANKRD26	1302	1313	1445	131	897	-1.99	0.0416484
RN7SL1	230	156	322	27	113	-1.99	0.00666312
ZC3H8	414	510	584	68	268	-1.992	0.00638472
TNIK	800	883	831	109	415	-1.994	0.0126262
CEP89	415	342	343	38	182	-2.004	0.0188392
GCC2	770	909	892	92	530	-2.009	0.033422
SLCO5A1	220	170	244	22	104	-2.029	0.0179546
PLCB1	327	431	534	69	195	-2.03	0.00124327
SBDS	190	250	342	35	135	-2.052	0.00666312
LZIC	525	464	398	52	194	-2.061	0.00877288
CCSER1	89	96	111	12	45	-2.072	0.0321366
ADM2	2	185	139	84	15	-2.104	0.034816
ASH1L	1683	1626	1901	185	880	-2.112	0.00964129
PUS7L	348	389	372	38	189	-2.13	0.0135638
AKAP9	8044	7943	8597	679	5134	-2.143	0.0439316
LOC101928673	36	66	64	10	20	-2.146	0.0338896
ATXN2L	55	147	211	23	66	-2.148	0.00666312
CCDC175	26	37	64	6	19	-2.15	0.0440131
TENM2	2841	3070	3122	386	1227	-2.165	0.00452882
FIGN	340	275	227	30	93	-2.195	0.00691273
PCLO	4290	3717	3896	324	2115	-2.195	0.0263536
ZNF397	598	720	568	71	267	-2.195	0.00666111
EEA1	744	764	831	56	513	-2.198	0.0399285
BMS1P4	137	128	128	13	53	-2.202	0.0217318
CCDC30	146	204	182	15	101	-2.225	0.0452058
CARS	171	803	1181	185	232	-2.234	9.94081e-06
TMED8	96	100	68	9	29	-2.246	0.0351222
KIAA1551	428	414	432	34	216	-2.25	0.0123447
TES	125	220	234	25	85	-2.259	0.00666312
RNU6ATAC	7	13	144	6	19	-2.268	0.0452058
PEX5L	27	155	222	37	40	-2.278	0.0021341
CCDC171	88	91	127	6	56	-2.305	0.0345421
ZNF608	1615	1871	1714	125	1023	-2.31	0.0397019
KLF3-AS1	64	64	68	7	21	-2.316	0.0227196
FILIP1L	92	129	142	10	61	-2.325	0.0236044
SLX4IP	63	110	125	14	37	-2.331	0.00699688
ZNF638	1703	1716	1683	129	819	-2.375	0.0126899
ATE1-AS1	73	111	119	6	58	-2.379	0.0433553
RHEBL1	12	68	119	10	28	-2.382	0.00729869
FAM171B	60	96	79	6	35	-2.385	0.0399285
NUPR1	10	160	82	32	15	-2.392	0.0039812
HRK	64	62	131	9	29	-2.418	0.00513739
ADGRA1-AS1	44	36	27	5	7	-2.428	0.0410632
SLC1A5	67	692	698	203	80	-2.43	4.22655e-05
MMP16	414	355	344	25	152	-2.44	0.00654762
SETD8	200	292	242	16	133	-2.44	0.0391251
CREG2	151	185	180	10	91	-2.445	0.034816
ATF5	263	1607	1105	213	276	-2.457	9.94081e-06
GTF2I	112	102	86	6	40	-2.459	0.0371307
SMDT1	39	78	64	11	15	-2.471	0.00832467
LOC101927550	117	183	120	10	59	-2.478	0.034816
SBDSP1	66	96	98	6	42	-2.48	0.0317601
CEP290	2102	2033	1910	104	1162	-2.486	0.0441892
RGS7BP	50	68	66	5	23	-2.519	0.0255535
RPL23AP53	20	49	14	9	2	-2.529	0.0442687
LGI4	80	118	100	6	47	-2.53	0.0399285
SLCO1A2	598	506	344	34	142	-2.538	0.00365672
ZC3H13	4391	4260	3585	209	2123	-2.543	0.0416484
RN7SL2	99	71	236	9	48	-2.553	0.000933472
RNA18S5	53	81	92	8	22	-2.597	0.0046799
EGFL6	7	33	98	9	10	-2.602	0.0140427
KCNB1	201	248	278	11	137	-2.608	0.0263536
ANKRD11	5601	10679	11549	775	4243	-2.612	0.00349134
SLC4A10	210	289	305	23	95	-2.614	0.00100434
BICD1	514	487	570	22	289	-2.633	0.0162391
PAPPA2	13	19	53	3	9	-2.65	0.0263056
DDX59	36	44	65	2	21	-2.662	0.0258913
ZNF790	74	41	59	1	22	-2.69	0.0397019
PCK2	15	279	363	63	37	-2.707	8.78325e-05
HMOX1	16	80	210	16	24	-2.748	0.000584067
FSIP2	1172	1064	1246	53	503	-2.778	0.0046799
ADAM20	20	25	32	2	7	-2.796	0.0295469
HERC2	224	68	139	3	41	-2.809	0.00456641
TRIP11	940	1012	1094	44	469	-2.827	0.00700613
PRKAR2A	112	188	139	6	67	-2.842	0.034816
SLC7A3	74	716	1087	196	73	-2.866	2.24588e-05
C11orf63	22	39	37	3	8	-2.895	0.0126899
C10orf12	169	182	127	6	50	-2.958	0.0154441
TTC3P1	566	637	621	15	362	-2.989	0.0422405
ZNF808	25	30	29	0	10	-3.051	0.0478434
SLC39A7	11	10	31	1	4	-3.079	0.0435135
SAMD1	121	218	138	4	70	-3.103	0.0459936
CCDC144CP	117	109	113	2	42	-3.113	0.017008
POTEE	151	276	219	8	76	-3.117	0.00647058
NCOA2	217	225	304	5	120	-3.165	0.0126899
SNORD50A	127	267	138	4	70	-3.253	0.0459936
PCDHGA12	35	22	30	0	7	-3.254	0.0222001
BMS1P21	56	57	52	0	18	-3.256	0.0292544
FAM129A	3	58	106	12	5	-3.259	0.00178899
PCDHA5	102	87	135	0	60	-3.259	0.0444242
CCDC144B	88	132	111	1	50	-3.299	0.0433553
SNORD26	132	266	114	9	28	-3.338	0.000732149
SCARNA9	250	224	168	3	72	-3.355	0.0251047
ALG11	89	54	71	0	19	-3.374	0.00964129
HIST1H1E	32	41	51	0	13	-3.402	0.0121917
ONECUT1	218	147	167	1	68	-3.416	0.0258913
DAB1	106	101	118	1	33	-3.461	0.00595091
RNU4ATAC	1150	1347	1405	23	609	-3.462	0.0179504
CCDC168	17	19	14	0	3	-3.505	0.0459936
LOC339529	11	7	25	0	3	-3.51	0.0494799
SOGA3	1076	1114	1279	17	571	-3.515	0.0222001
PRRG3	17	17	23	0	4	-3.516	0.0276568
GABRA3	16	22	26	0	5	-3.517	0.0222001
PLEKHA8P1	11	24	18	0	4	-3.532	0.034816
LURAP1L-AS1	40	479	580	23	83	-3.535	3.39001e-09
ASS1	16	74	104	6	10	-3.549	3.91498e-05
ANO4	37	33	35	0	7	-3.573	0.00717908
PWAR1	39	28	47	1	6	-3.575	0.00245684
RNA28S5	126	113	83	0	31	-3.62	0.0266905
EML5	38	29	34	0	6	-3.657	0.00638472
RPL17	154	672	978	107	31	-3.761	3.54089e-08
AGPAT1	16	579	118	28	13	-3.842	6.60964e-09
KCNH7	20	22	21	0	3	-3.932	0.011477
UNC5B	32	599	644	48	33	-3.957	3.38142e-15
POTEF	153	261	277	2	72	-3.96	0.00365672
HIST1H4C	1132	1673	1343	15	480	-4.046	0.0126899
ESR2	10	22	14	0	2	-4.085	0.0208431
ALMS1P	16	18	20	0	2	-4.245	0.00964129
COX16	96	63	61	0	8	-4.248	0.000128603
POU6F2	11	10	14	0	1	-4.382	0.0301546
POTEI	0	74	12	0	2	-4.918	0.0021341
TLR9	8	12	23	0	1	-4.943	0.00666312
NPIPB11	3	255	11	3	2	-5.215	9.94081e-06
KLHDC7B	4	40	38	1	0	-6.066	9.94081e-06
F10	6	11	8	0	0	-6.304	0.0156483
SP140	11	11	13	0	0	-6.601	0.00647058
