# Supplementary material for: Targeting p75NTR activity alleviates the neurotoxic effect of high glucose on iPSC-derived dopaminergic neurons
Source: Stem Cell Res Ther. 2026 Mar 21;17:161. doi: 10.1186/s13287-026-04965-y (PMC13126899; doi:10.1186/s13287-026-04965-y)
Supplement: Supplementary file 3 — Supplementary Material 3. Table S2. List of DEGs (p adj < 0.05). [file 13287_2026_4965_MOESM3_ESM.xlsx]

## Sheet: Total
Id	X20mM_n.10	X20mM_n.11	X20mM_n.12	X100mM_n.11	X100mM_n.12	norm.20mM_n.10	norm.20mM_n.11	norm.20mM_n.12	norm.100mM_n.11	norm.100mM_n.12	baseMean	X20mM	X100mM	FC	log2FoldChange	pvalue	padj	tagwise.dispersion	trended.dispersion
ACAT2	1396	240	378	935	1346	1560	269	347	858	1302	867.24	725	1080	3.461	1.791	4.60201e-06	0.0021341	0.0673	0.071
ACSBG1	39	16	19	86	77	44	18	17	79	74	46.48	26	76	4.312	2.108	0.000228192	0.0222001	0.119	0.1233
ACTA2	152	201	84	747	477	170	225	77	686	461	323.87	157	574	4.229	2.08	4.37364e-07	0.000338034	0.0702	0.0702
ADAM20	18	22	35	2	7	20	25	32	2	7	17.1	26	4	0.144	-2.796	0.000373796	0.0295469	0.176	0.1888
ADGRA1-AS1	39	32	29	5	7	44	36	27	5	7	23.49	36	6	0.186	-2.428	0.000687426	0.0410632	0.1535	0.1611
ADM2	2	165	151	92	15	2	185	139	84	15	84.94	109	50	0.233	-2.104	0.000488701	0.034816	0.1373	0.109
AGPAT1	14	516	129	31	13	16	579	118	28	13	150.71	238	20	0.07	-3.842	1.90041e-12	6.60964e-09	0.0958	0.0938
AKAP9	7197	7085	9371	740	5308	8044	7943	8597	679	5134	6079.43	8195	2906	0.226	-2.143	0.000798929	0.0439316	0.1504	0.0942
ALG11	80	48	77	0	20	89	54	71	0	19	46.64	71	10	0.096	-3.374	6.16788e-05	0.00964129	0.2102	0.1235
ALMS1P	14	16	22	0	2	16	18	20	0	2	11.14	18	1	0.053	-4.245	5.97118e-05	0.00964129	0.2315	0.2373
ANKRD11	5011	9525	12589	844	4387	5601	10679	11549	775	4243	6569.3	9276	2509	0.164	-2.612	8.78356e-06	0.00349134	0.1311	0.0948
ANKRD26	1165	1171	1575	143	927	1302	1313	1445	131	897	1017.54	1353	514	0.252	-1.99	0.000727471	0.0416484	0.1309	0.0736
ANKRD36	637	412	552	65	299	712	462	506	60	289	405.82	560	174	0.277	-1.85	0.000279374	0.0249465	0.102	0.0669
ANO4	33	29	38	0	7	37	33	35	0	7	22.21	35	4	0.084	-3.573	3.87026e-05	0.00717908	0.1997	0.1654
ARHGAP31	86	80	45	331	107	96	90	41	304	103	126.89	76	204	2.928	1.55	0.00087581	0.0452058	0.0891	0.0991
ASH1L	1506	1450	2072	202	910	1683	1626	1901	185	880	1255.06	1737	532	0.231	-2.112	6.14554e-05	0.00964129	0.1111	0.0772
ASNS	880	4372	4540	2271	1358	984	4902	4165	2085	1313	2689.68	3350	1699	0.366	-1.449	0.000409423	0.0316438	0.0769	0.0873
ASS1	14	66	113	6	10	16	74	104	6	10	41.7	65	8	0.085	-3.549	3.37692e-08	3.91498e-05	0.1267	0.1272
ATE1-AS1	65	99	130	7	60	73	111	119	6	58	73.47	101	32	0.192	-2.379	0.000781404	0.0433553	0.1732	0.1121
ATF5	235	1433	1204	232	285	263	1607	1105	213	276	692.49	992	244	0.182	-2.457	6.43094e-09	9.94081e-06	0.0744	0.068
ATXN2L	49	131	230	25	68	55	147	211	23	66	100.27	138	44	0.226	-2.148	3.15796e-05	0.00666312	0.1045	0.1054
B9D1	9	7	7	47	39	10	8	6	43	38	21.04	8	40	5.6	2.486	0.000285117	0.0251047	0.1473	0.1679
BEND6	79	164	431	72	101	88	184	395	66	98	166.27	222	82	0.297	-1.751	0.000104688	0.0135638	0.0851	0.0902
BEST3	19	3	2	26	25	21	3	2	24	24	14.9	9	24	9.079	3.183	0.000184734	0.0193235	0.1821	0.2021
BICD1	460	434	621	24	299	514	487	570	22	289	376.32	524	156	0.161	-2.633	0.000136571	0.0162391	0.1587	0.0677
BIRC5	194	109	66	368	213	217	122	61	338	206	188.68	133	272	3.056	1.612	0.000162811	0.0180924	0.0769	0.0859
BMS1P21	50	51	57	0	19	56	57	52	0	18	36.75	55	9	0.105	-3.256	0.000367993	0.0292544	0.2426	0.1327
BMS1P4	123	114	139	14	55	137	128	128	13	53	91.77	131	33	0.217	-2.202	0.000215569	0.0217318	0.1309	0.1074
BNC2	478	198	208	79	74	534	222	191	73	72	218.23	316	72	0.35	-1.513	0.000246386	0.0234776	0.0705	0.0811
BVES	12	11	7	56	34	13	12	6	51	33	23.29	10	42	4.536	2.181	0.00102944	0.0495555	0.1456	0.1598
C10orf12	151	162	138	6	52	169	182	127	6	50	106.56	159	28	0.129	-2.958	0.000124335	0.0154441	0.1909	0.104
C11orf63	20	35	40	3	8	22	39	37	3	8	21.76	33	6	0.134	-2.895	9.01604e-05	0.0126899	0.162	0.1668
C1orf27	332	429	627	125	354	371	481	575	115	342	376.87	476	228	0.38	-1.396	0.000991219	0.0484388	0.0768	0.0677
CACNG2	212	195	285	35	139	237	219	261	32	134	176.72	239	83	0.283	-1.821	0.000564473	0.0371307	0.1107	0.0882
CADM2	833	1239	1417	336	635	931	1389	1300	308	614	908.53	1207	461	0.325	-1.624	0.000129848	0.0157082	0.0787	0.0718
CALR	1171	743	944	4093	1669	1309	833	866	3757	1614	1675.87	1003	2686	2.899	1.536	0.000817913	0.0441892	0.0921	0.0816
CARS	153	716	1287	201	240	171	803	1181	185	232	514.22	718	208	0.213	-2.234	6.13545e-09	9.94081e-06	0.0626	0.066
CCDC144B	79	118	121	1	52	88	132	111	1	50	76.56	110	26	0.102	-3.299	0.000778796	0.0433553	0.2684	0.1113
CCDC144CP	105	97	123	2	43	117	109	113	2	42	76.47	113	22	0.116	-3.113	0.000145482	0.017008	0.2083	0.1113
CCDC168	15	17	15	0	3	17	19	14	0	3	10.5	17	2	0.088	-3.505	0.000907941	0.0459936	0.2638	0.2455
CCDC171	79	81	138	7	58	88	91	127	6	56	73.65	102	31	0.202	-2.305	0.000475932	0.0345421	0.1542	0.112
CCDC175	23	33	70	6	20	26	37	64	6	19	30.35	42	12	0.225	-2.15	0.000803574	0.0440131	0.14	0.1422
CCDC30	131	182	198	16	104	146	204	182	15	101	129.48	177	58	0.214	-2.225	0.000877342	0.0452058	0.1587	0.0986
CCDC66	679	931	1114	286	571	759	1044	1022	263	552	727.89	942	408	0.37	-1.436	0.00065921	0.0399285	0.0781	0.0686
CCL2	4	7	21	121	47	4	8	19	111	45	37.62	10	78	5.394	2.431	0.000745317	0.0422405	0.1758	0.1307
CCNB1	95	46	56	254	187	106	52	51	233	181	124.63	70	207	3.979	1.993	2.29256e-05	0.00595091	0.0892	0.0996
CCNB2	123	71	47	316	176	137	80	43	290	170	144.1	87	230	3.783	1.92	3.01908e-05	0.00666312	0.0863	0.0951
CCSER1	80	86	121	13	47	89	96	111	12	45	70.85	99	28	0.238	-2.072	0.000420419	0.0321366	0.1286	0.1129
CD58	39	28	14	123	73	44	31	13	113	71	54.27	29	92	4.363	2.125	0.000163862	0.0180924	0.1174	0.1189
CD9	10	8	18	97	52	11	9	17	89	50	35.2	12	70	5.265	2.396	0.00026051	0.0240014	0.1481	0.1338
CDC45	27	16	5	75	47	30	18	5	69	45	33.4	18	57	5.688	2.508	0.000125814	0.0154896	0.141	0.1367
CDCA5	29	50	22	205	73	32	56	20	188	71	73.49	36	130	3.412	1.771	0.000533471	0.0362032	0.1019	0.112
CENPA	11	11	7	61	37	12	12	6	56	36	24.57	10	46	4.938	2.304	0.000477446	0.0345421	0.1429	0.1557
CEP290	1881	1813	2082	113	1202	2102	2033	1910	104	1162	1462.25	2015	633	0.179	-2.486	0.000814359	0.0441892	0.1809	0.0796
CEP350	1322	1511	1938	354	1066	1478	1694	1778	325	1031	1261.1	1650	678	0.335	-1.58	0.000969799	0.0478434	0.0976	0.0773
CEP89	371	305	374	41	188	415	342	343	38	182	263.84	367	110	0.249	-2.004	0.000174688	0.0188392	0.1094	0.0753
CFAP126	46	18	11	101	55	51	20	10	93	53	45.52	27	73	4.864	2.282	0.000111612	0.0140427	0.1222	0.124
CFAP43	33	58	145	20	35	37	65	133	18	34	57.43	78	26	0.268	-1.898	0.000443316	0.0329809	0.1111	0.1175
CHAC1	197	5089	5151	1747	2341	220	5706	4726	1604	2264	2903.82	3551	1934	0.367	-1.446	0.000642781	0.0399285	0.0813	0.0881
CNN1	15	22	16	146	54	17	25	15	134	52	48.47	19	93	4.421	2.144	0.000183225	0.0193108	0.1193	0.1219
CNN2	704	771	404	2572	905	787	864	371	2361	875	1051.64	674	1618	2.541	1.345	0.000552084	0.0368058	0.0691	0.0742
CNTNAP5	194	173	371	33	193	217	194	340	30	187	193.62	250	108	0.304	-1.719	0.000834559	0.0442687	0.1056	0.085
COL1A1	19	26	3	136	25	21	29	3	125	24	40.43	18	74	5.402	2.434	0.000153391	0.0176361	0.1323	0.1281
COL27A1	353	274	147	588	531	395	307	135	540	514	377.98	279	527	2.575	1.365	0.000819622	0.0441892	0.0719	0.0677
COX16	86	56	67	0	8	96	63	61	0	8	45.62	73	4	0.053	-4.248	1.47905e-07	0.000128603	0.172	0.1243
CREG2	135	165	196	11	94	151	185	180	10	91	123.34	172	50	0.184	-2.445	0.000505523	0.034816	0.1698	0.1
CSRP2	139	130	83	441	266	155	146	76	405	257	207.87	126	331	3.055	1.611	9.70117e-05	0.0128536	0.0727	0.0826
CTGF	83	192	270	1307	413	93	215	248	1200	399	430.99	185	800	2.998	1.584	0.000713477	0.0415309	0.0904	0.0664
CYP51A1	694	313	666	1247	1301	776	351	611	1145	1258	828.11	579	1202	2.588	1.372	0.000546627	0.0367376	0.0708	0.0703
DAB1	95	90	129	1	34	106	101	118	1	33	71.85	108	17	0.091	-3.461	2.30442e-05	0.00595091	0.2038	0.1126
DDX59	32	39	71	2	22	36	44	65	2	21	33.55	48	12	0.158	-2.662	0.000299811	0.0258913	0.1752	0.1368
DEPDC1B	28	23	17	116	57	31	26	16	106	55	46.86	24	80	3.815	1.932	0.000653694	0.0399285	0.119	0.123
DHX36	1958	1817	2394	261	1398	2188	2037	2196	240	1352	1602.69	2140	796	0.271	-1.886	0.000984886	0.048416	0.1279	0.081
DNAH14	241	238	329	57	160	269	267	302	52	155	209.02	279	104	0.322	-1.634	0.000471859	0.0345421	0.09	0.0825
DNAJC21	384	380	535	110	295	429	426	491	101	285	346.46	449	193	0.375	-1.417	0.000904517	0.0459936	0.0776	0.069
E2F2	58	65	27	199	107	65	73	25	183	103	89.73	54	143	3.185	1.671	0.000864753	0.0450578	0.1008	0.1078
EEA1	666	681	906	61	530	744	764	831	56	513	581.52	780	284	0.218	-2.198	0.000645048	0.0399285	0.1471	0.0665
EEF1D	22	12	5	703	15	25	13	5	645	15	140.5	14	330	17.144	4.1	2.56056e-07	0.000209544	0.1457	0.0958
EFS	51	68	18	231	71	57	76	17	212	69	86.1	50	140	3.323	1.732	0.000660117	0.0399285	0.1009	0.1087
EGFL6	6	29	107	10	10	7	33	98	9	10	31.25	46	10	0.165	-2.602	0.000112042	0.0140427	0.1472	0.1401
EIF4EBP1	54	455	470	140	127	60	510	431	129	123	250.6	334	126	0.268	-1.899	1.409e-06	0.00093343	0.0657	0.0767
EML5	34	26	37	0	6	38	29	34	0	6	21.38	34	3	0.079	-3.657	2.55079e-05	0.00638472	0.1925	0.1686
EPPK1	51	40	20	147	74	57	45	18	135	72	65.34	40	104	3.389	1.761	0.000833589	0.0442687	0.1071	0.1145
ESF1	564	621	955	135	437	630	696	876	124	423	549.86	734	274	0.295	-1.759	8.32528e-05	0.0121917	0.0841	0.0662
ESR2	9	20	15	0	2	10	22	14	0	2	9.64	15	1	0.059	-4.085	0.000203756	0.0208431	0.2607	0.2561
F10	5	10	9	0	0	6	11	8	0	0	5.01	8	0	0.013	-6.304	0.000128228	0.0156483	0.319	0.3406
FAM129A	3	52	116	13	5	3	58	106	12	5	36.97	56	8	0.104	-3.259	3.47202e-06	0.00178899	0.1558	0.1319
FAM13C	313	450	382	87	188	350	505	350	80	182	293.3	402	131	0.289	-1.79	0.000152759	0.0176361	0.0907	0.0725
FAM171B	54	86	86	7	36	60	96	79	6	35	55.38	78	20	0.191	-2.385	0.000648707	0.0399285	0.1695	0.1186
FAM184A	484	492	626	164	317	541	552	574	151	307	424.8	556	229	0.383	-1.383	0.000493349	0.034816	0.0687	0.0665
FAM64A	61	30	23	140	146	68	34	21	129	141	78.53	41	135	5.015	2.326	1.33347e-05	0.00452469	0.1072	0.1106
FBXO25	348	312	398	114	183	389	350	365	105	177	277.1	368	141	0.382	-1.387	0.000512471	0.0351207	0.0688	0.0739
FDFT1	1384	377	526	1240	1357	1547	423	483	1138	1312	980.56	818	1225	2.706	1.436	0.000202467	0.0208431	0.0677	0.073
FDPS	1359	329	408	790	1229	1519	369	374	725	1189	835.18	754	957	2.5	1.322	0.000901525	0.0459936	0.0711	0.0705
FIGN	304	245	247	33	96	340	275	227	30	93	192.84	281	62	0.218	-2.195	3.37885e-05	0.00691273	0.1078	0.0852
FILIP1L	82	115	155	11	63	92	129	142	10	61	86.76	121	36	0.2	-2.325	0.000251115	0.0236044	0.1458	0.1086
FLJ16779	159	96	24	248	115	178	108	22	228	111	129.25	103	170	3.16	1.66	0.00101507	0.0492042	0.1018	0.0986
FOXJ1	58	73	102	498	400	65	82	94	457	387	216.85	80	422	4.792	2.261	7.33235e-08	7.28626e-05	0.0719	0.0811
FOXN4	41	32	22	188	119	46	36	20	173	115	77.91	34	144	5.202	2.379	5.04681e-06	0.00226488	0.1022	0.1108
FOXP1	476	506	661	274	268	532	567	606	252	259	443.29	568	256	0.435	-1.199	0.000992313	0.0484388	0.0595	0.0662
FRZB	170	96	68	339	173	190	108	62	311	167	167.71	120	239	2.784	1.477	0.000782215	0.0433553	0.0818	0.0899
FSIP2	1049	949	1358	58	520	1172	1064	1246	53	503	807.68	1161	278	0.146	-2.778	1.61469e-05	0.0046799	0.145	0.07
GABRA3	14	20	28	0	5	16	22	26	0	5	13.72	21	2	0.087	-3.517	0.000227081	0.0222001	0.2342	0.2125
GCC2	689	811	972	100	548	770	909	892	92	530	638.57	857	311	0.248	-2.009	0.000451648	0.033422	0.1243	0.0672
GJA1	219	153	130	543	389	245	172	119	498	376	282.05	179	437	3.025	1.597	3.26811e-05	0.00678596	0.0637	0.0734
GPATCH8	1496	1653	2253	327	1183	1672	1853	2067	300	1144	1407.3	1864	722	0.301	-1.734	0.000495603	0.034816	0.1034	0.079
GPC4	233	251	179	756	475	260	281	164	694	459	371.89	235	576	2.624	1.392	0.000171827	0.0186754	0.0606	0.0679
GTF2I	100	91	94	6	41	112	102	86	6	40	69.04	100	23	0.182	-2.459	0.000570379	0.0371307	0.1729	0.1135
HERC2	200	61	152	3	42	224	68	139	3	41	94.95	144	22	0.143	-2.809	1.44424e-05	0.00456641	0.1399	0.1067
HIST1H1C	283	416	529	201	228	316	466	485	185	221	334.61	422	203	0.424	-1.237	0.00083271	0.0442687	0.0608	0.0696
HIST1H1E	29	37	56	0	13	32	41	51	0	13	27.57	41	6	0.095	-3.402	8.31756e-05	0.0121917	0.2169	0.1487
HIST1H4C	1013	1492	1464	16	496	1132	1673	1343	15	480	928.49	1383	248	0.061	-4.046	9.48639e-05	0.0126899	0.2703	0.0721
HMOX1	14	71	229	17	25	16	80	210	16	24	69.02	102	20	0.149	-2.748	7.97677e-07	0.000584067	0.1099	0.1133
HRK	57	55	143	10	30	64	62	131	9	29	58.95	86	19	0.187	-2.418	1.84639e-05	0.00513739	0.1129	0.1169
HSPA2	6	8	6	49	39	7	9	6	45	38	20.78	7	42	5.738	2.521	0.000252807	0.0236044	0.1492	0.1689
IFIT1	90	38	14	152	68	101	43	13	140	66	72.27	52	103	3.992	1.997	0.000182651	0.0193108	0.1057	0.1124
IFT74	158	126	204	33	82	177	141	187	30	79	122.92	168	54	0.307	-1.705	0.00055558	0.0368058	0.0985	0.1001
IGFBP7	18	23	3	126	20	20	26	3	116	19	36.73	16	68	5.142	2.362	0.000251811	0.0236044	0.1291	0.132
INSM1	121	155	231	929	410	135	174	212	853	397	354.06	174	625	3.026	1.597	0.000230784	0.0222963	0.0793	0.0686
ITGB5	338	346	208	848	582	378	388	191	778	563	459.57	319	670	2.428	1.28	0.000713145	0.0415309	0.0637	0.0661
JMJD1C	765	936	1224	272	656	855	1049	1123	250	634	782.29	1009	442	0.368	-1.443	0.000920641	0.0459936	0.0827	0.0695
JMY	536	641	819	124	362	599	719	751	114	350	506.6	690	232	0.274	-1.867	3.61815e-05	0.00700613	0.0847	0.066
JPH4	880	979	1394	263	555	984	1098	1279	241	537	827.64	1120	389	0.305	-1.715	3.52859e-05	0.00700613	0.0751	0.0703
KCNB1	180	221	303	12	142	201	248	278	11	137	175.06	242	74	0.164	-2.608	0.000313214	0.0263536	0.1752	0.0885
KCNH7	18	20	23	0	3	20	22	21	0	3	13.31	21	2	0.066	-3.932	7.54857e-05	0.011477	0.2251	0.2167
KIAA1551	383	369	471	37	223	428	414	432	34	216	304.7	425	125	0.21	-2.25	8.51847e-05	0.0123447	0.1213	0.0716
KIF20A	26	13	27	151	62	29	15	25	139	60	53.4	23	100	4.668	2.223	0.000500332	0.034816	0.1464	0.1192
KIF2C	33	33	37	156	114	37	37	34	143	110	72.26	36	126	3.536	1.822	0.000345826	0.0279717	0.1025	0.1123
KLF3	330	471	630	97	283	369	528	578	89	274	367.52	492	182	0.286	-1.807	4.74507e-05	0.00832467	0.0818	0.068
KLF3-AS1	57	57	74	8	22	64	64	68	7	21	44.82	65	14	0.201	-2.316	0.000236799	0.0227196	0.1387	0.1248
KLHDC7B	4	36	41	1	0	4	40	38	1	0	16.67	27	0	0.015	-6.066	6.26277e-09	9.94081e-06	0.18	0.1914
KLHL1	7	12	41	80	108	8	13	38	73	104	47.36	20	88	3.757	1.91	0.000944098	0.0469082	0.1258	0.1226
KPNA5	435	438	493	68	280	486	491	452	62	271	352.55	476	166	0.281	-1.83	0.000442987	0.0329809	0.1061	0.0687
LARS	706	1395	1995	566	618	789	1564	1830	520	598	1060.12	1394	559	0.329	-1.602	4.09193e-05	0.00739311	0.0688	0.0743
LGI2	126	80	110	160	917	141	90	101	147	887	273.03	111	517	3.845	1.943	0.000485893	0.034816	0.1163	0.0743
LGI4	72	105	109	6	49	80	118	100	6	47	70.22	99	26	0.173	-2.53	0.000653762	0.0399285	0.1847	0.1131
LINC00261	3	0	0	13	10	3	0	0	12	10	4.99	1	11	86.528	6.435	9.94298e-05	0.0130497	0.3147	0.3345
LINC00324	164	97	424	42	82	183	109	389	39	79	159.78	227	59	0.266	-1.912	5.63905e-05	0.00922946	0.0899	0.0916
LOC101927550	105	163	131	11	61	117	183	120	10	59	97.88	140	34	0.18	-2.478	0.00050448	0.034816	0.1734	0.106
LOC101928673	32	59	70	11	21	36	66	64	10	20	39.31	55	15	0.226	-2.146	0.000460403	0.0338896	0.1344	0.1296
LOC339529	10	6	27	0	3	11	7	25	0	3	9.11	14	2	0.088	-3.51	0.00102431	0.0494799	0.2444	0.2597
LOC440910	55	81	92	20	32	61	91	84	18	31	57.2	79	24	0.276	-1.858	0.000859439	0.0449493	0.1184	0.1177
LOC441204	197	259	314	66	110	220	290	288	61	106	193.12	266	84	0.279	-1.84	3.78059e-05	0.00710752	0.0826	0.0851
LOC728730	39	75	90	22	24	44	84	83	20	23	50.73	70	22	0.261	-1.937	0.000429809	0.0326443	0.1139	0.1209
LRIF1	549	569	1011	199	439	614	638	927	183	425	557.26	726	304	0.363	-1.461	0.000218144	0.0218332	0.0692	0.0663
LSM14A	49	7	8	95	28	55	8	7	87	27	36.85	23	57	6.431	2.685	7.58976e-05	0.011477	0.1401	0.1321
LTN1	446	501	696	168	299	498	562	639	154	289	428.42	566	222	0.354	-1.499	9.4487e-05	0.0126899	0.0644	0.0664
LURAP1L-AS1	36	427	632	25	86	40	479	580	23	83	240.98	366	53	0.086	-3.535	7.31026e-13	3.39001e-09	0.0865	0.0779
LZIC	470	414	434	57	201	525	464	398	52	194	326.87	462	123	0.24	-2.061	5.17091e-05	0.00877288	0.1008	0.0701
MAP7D2	434	578	959	276	305	485	648	880	253	295	512.25	671	274	0.362	-1.466	9.21493e-05	0.0126899	0.0626	0.066
MBD5	414	345	362	45	205	463	387	332	41	198	284.24	394	120	0.26	-1.944	0.000479199	0.0345421	0.1172	0.0733
MEGF9	396	304	340	85	177	443	341	312	78	171	268.91	365	124	0.358	-1.484	0.000641612	0.0399285	0.0792	0.0747
MEST	190	213	365	1026	613	212	239	335	942	593	464.15	262	768	2.637	1.399	0.000755741	0.0423946	0.0751	0.0661
MIF	123	26	22	178	253	137	29	20	163	245	118.98	62	204	8.189	3.034	1.30835e-08	1.82018e-05	0.1011	0.101
MMP16	370	317	375	27	157	414	355	344	25	152	257.92	371	88	0.184	-2.44	2.77681e-05	0.00654762	0.123	0.0759
MVK	348	69	115	249	279	389	77	106	229	270	214.04	191	250	2.743	1.456	0.000400919	0.0311597	0.0714	0.0817
MYRF	16	26	13	134	42	18	29	12	123	41	44.52	20	82	3.807	1.929	0.000894217	0.0459053	0.1228	0.1246
N4BP2	498	487	749	189	359	557	546	687	174	347	462.09	597	260	0.402	-1.315	0.000601849	0.0385849	0.0651	0.0661
N4BP2L2	1136	1487	2201	472	847	1270	1667	2019	433	819	1241.7	1652	626	0.325	-1.621	9.10577e-05	0.0126899	0.0768	0.077
NCOA2	194	201	331	5	124	217	225	304	5	120	174.07	249	62	0.111	-3.165	9.44847e-05	0.0126899	0.2027	0.0887
NCOA7	503	856	1363	222	450	562	960	1250	204	435	682.27	924	320	0.273	-1.875	3.41791e-06	0.00178899	0.0709	0.0678
NEUROG1	55	15	8	134	38	61	17	7	123	37	49.08	28	80	6.126	2.615	1.65186e-05	0.00468995	0.1193	0.1217
NEUROG2	8	3	2	45	12	9	3	2	41	12	13.41	5	26	8.919	3.157	0.000333402	0.0275853	0.1895	0.2119
NOC3L	115	131	175	35	60	129	147	161	32	58	105.22	146	45	0.284	-1.817	0.000276277	0.0249465	0.1003	0.1043
NOS1AP	201	354	354	111	165	225	397	325	102	160	241.56	316	131	0.356	-1.488	0.000350355	0.0281742	0.0739	0.0778
NPIPB11	3	227	12	3	2	3	255	11	3	2	54.71	90	2	0.027	-5.215	4.47566e-09	9.94081e-06	0.1412	0.1192
NPTX2	134	89	88	344	209	150	100	81	316	202	169.64	110	259	2.814	1.493	0.000687733	0.0410632	0.0823	0.0895
NSD1	607	687	775	224	345	678	770	711	206	334	539.79	720	270	0.355	-1.496	0.000194957	0.0202406	0.0709	0.0661
NUMA1	2097	2863	2363	1107	992	2344	3210	2168	1016	959	1939.41	2574	988	0.374	-1.418	0.000609172	0.0388752	0.078	0.0836
NUPR1	9	143	89	35	15	10	160	82	32	15	59.73	84	24	0.19	-2.392	1.14468e-05	0.0039812	0.1097	0.1167
ONECUT1	195	131	182	1	70	218	147	167	1	68	120.08	177	34	0.094	-3.416	0.000301494	0.0258913	0.2514	0.1008
PAPPA2	12	17	58	3	9	13	19	53	3	9	19.43	28	6	0.159	-2.65	0.00030821	0.0263056	0.1568	0.1754
PCDHA5	91	78	147	0	62	102	87	135	0	60	76.8	108	30	0.104	-3.259	0.000843012	0.0444242	0.2675	0.1112
PCDHGA12	31	20	33	0	7	35	22	30	0	7	18.82	29	4	0.105	-3.254	0.000226061	0.0222001	0.206	0.18
PCK2	13	249	396	69	38	15	279	363	63	37	151.42	219	50	0.153	-2.707	9.47015e-08	8.78325e-05	0.099	0.0934
PCLO	3838	3315	4247	353	2187	4290	3717	3896	324	2115	2868.33	3968	1220	0.218	-2.195	0.000314455	0.0263536	0.1391	0.088
PEX5L	24	138	242	40	41	27	155	222	37	40	95.99	135	38	0.206	-2.278	4.59897e-06	0.0021341	0.0967	0.1064
PHF1	12	2	9	217	18	13	2	8	199	17	48.1	8	108	11.229	3.489	0.000583826	0.0377776	0.26	0.122
PHGDH	257	2797	3112	1135	615	287	3136	2855	1042	595	1582.96	2093	818	0.263	-1.925	6.10591e-06	0.0025741	0.0798	0.0808
PIF1	46	23	7	115	48	51	26	6	106	46	47.12	28	76	5.175	2.372	8.1804e-05	0.0121917	0.1246	0.1229
PLCB1	293	384	582	75	202	327	431	534	69	195	311.23	431	132	0.245	-2.03	2.18321e-06	0.00124327	0.0755	0.0711
PLEKHA8P1	10	21	20	0	4	11	24	18	0	4	11.39	18	2	0.086	-3.532	0.000501218	0.034816	0.2597	0.2348
PLK1	232	193	122	858	258	259	216	112	788	250	324.95	196	519	2.862	1.517	0.000106272	0.0135638	0.0656	0.0702
POTEE	135	246	239	9	79	151	276	219	8	76	146.12	215	42	0.115	-3.117	2.67533e-05	0.00647058	0.1794	0.0947
POTEF	137	233	302	2	74	153	261	277	2	72	152.96	230	37	0.064	-3.96	9.98815e-06	0.00365672	0.23	0.0932
POTEI	0	66	13	0	2	0	74	12	0	2	17.57	29	1	0.033	-4.918	4.49477e-06	0.0021341	0.2207	0.1884
POU6F2	10	9	15	0	1	11	10	14	0	1	7.2	12	0	0.048	-4.382	0.000385819	0.0301546	0.2719	0.2925
PPP1R17	17	2	2	27	18	19	2	2	25	17	13.05	8	21	9.717	3.28	0.00025846	0.0239713	0.1927	0.2164
PRICKLE1	290	431	420	168	184	324	483	385	154	178	304.97	397	166	0.384	-1.38	0.000357842	0.0286109	0.0653	0.0716
PRKAR2A	100	168	152	6	69	112	188	139	6	67	102.36	146	36	0.14	-2.842	0.000503214	0.034816	0.2094	0.105
PRRG3	15	15	25	0	4	17	17	23	0	4	12.08	19	2	0.087	-3.516	0.000339945	0.0276568	0.2348	0.2272
PTTG1	515	398	218	1131	512	576	446	200	1038	495	551.05	407	766	2.399	1.262	0.000822672	0.0441892	0.0641	0.0662
PUS7L	311	347	406	41	195	348	389	372	38	189	267.07	370	114	0.228	-2.13	0.000105817	0.0135638	0.1142	0.0749
PWAR1	35	25	51	1	6	39	28	47	1	6	24.13	38	4	0.084	-3.575	5.65115e-06	0.00245684	0.1601	0.1583
PYCR1	318	1269	1418	327	448	355	1423	1301	300	433	762.5	1026	366	0.265	-1.914	2.23417e-06	0.00124327	0.0714	0.0692
RBBP8	171	370	545	152	242	191	415	500	140	234	295.9	369	187	0.398	-1.33	0.000567099	0.0371307	0.0655	0.0723
RBM12B	317	250	483	88	220	354	280	443	81	213	274.25	359	147	0.375	-1.415	0.000433259	0.0326443	0.0693	0.0742
RBM27	900	951	1561	287	840	1006	1066	1432	263	812	916.01	1168	538	0.376	-1.412	0.00101253	0.0492042	0.081	0.0719
RGS7BP	45	61	72	5	24	50	68	66	5	23	42.51	61	14	0.174	-2.519	0.000293887	0.0255535	0.1646	0.1267
RHEBL1	11	61	130	11	29	12	68	119	10	28	47.62	66	19	0.192	-2.382	3.98721e-05	0.00729869	0.1214	0.1226
RN7SL1	206	139	351	29	117	230	156	322	27	113	169.57	236	70	0.252	-1.99	3.13147e-05	0.00666312	0.0912	0.0896
RN7SL2	89	63	257	10	50	99	71	236	9	48	92.68	135	28	0.17	-2.553	1.47616e-06	0.000933472	0.1004	0.1071
RNA18S5	47	72	100	9	23	53	81	92	8	22	51.1	75	15	0.165	-2.597	1.57701e-05	0.0046799	0.126	0.1207
RNA28S5	113	101	91	0	32	126	113	83	0	31	70.79	107	16	0.081	-3.62	0.000320394	0.0266905	0.2746	0.113
RNF115	617	651	940	93	501	690	730	862	85	485	570.35	761	285	0.26	-1.942	0.000288555	0.0252476	0.1123	0.0664
RNPC3	479	491	515	119	255	535	550	472	109	247	382.84	519	178	0.324	-1.625	0.00016658	0.0182477	0.0783	0.0675
RNU4ATAC	1029	1201	1532	25	630	1150	1347	1405	23	609	906.86	1301	316	0.091	-3.462	0.000157415	0.0179504	0.2329	0.0717
RNU6ATAC	6	12	157	6	20	7	13	144	6	19	37.81	55	12	0.208	-2.268	0.000876964	0.0452058	0.1411	0.1305
RPL17	138	599	1066	117	32	154	672	978	107	31	388.42	601	69	0.074	-3.761	1.2726e-11	3.54089e-08	0.1062	0.0673
RPL23AP53	18	44	15	10	2	20	49	14	9	2	18.86	28	6	0.173	-2.529	0.00083688	0.0442687	0.161	0.1806
RPS17	49	153	42	2625	1039	55	172	39	2410	1005	735.88	89	1708	18.799	4.233	3.63147e-20	5.0521e-16	0.0742	0.0687
RRM2	171	105	54	430	194	191	118	50	395	188	188.15	120	292	3.552	1.829	2.30987e-05	0.00595091	0.0772	0.086
S1PR3	16	11	14	97	43	18	12	13	89	42	34.74	14	66	4.799	2.263	0.000337013	0.0275853	0.137	0.1345
SAMD1	108	194	150	4	72	121	218	138	4	70	109.83	159	37	0.116	-3.103	0.000909305	0.0459936	0.25	0.1032
SAPCD2	115	69	59	270	147	129	77	54	248	142	130.01	87	195	2.901	1.537	0.000857067	0.0449493	0.0885	0.0984
SARS	1182	3189	3633	1082	1231	1321	3575	3333	993	1191	2082.64	2743	1092	0.315	-1.666	5.31015e-05	0.00890059	0.0768	0.0845
SBDS	170	223	373	38	140	190	250	342	35	135	190.5	261	85	0.241	-2.052	3.16106e-05	0.00666312	0.097	0.0856
SBDSP1	59	86	107	6	43	66	96	98	6	42	61.52	87	24	0.179	-2.48	0.00041321	0.0317601	0.1699	0.116
SCARA3	261	193	87	539	279	292	216	80	495	270	270.51	196	382	2.764	1.467	0.000214321	0.0217318	0.0673	0.0745
SCARNA9	224	200	183	3	74	250	224	168	3	72	143.36	214	38	0.098	-3.355	0.000283593	0.0251047	0.2421	0.0954
SCYL2	704	748	896	108	530	787	839	822	99	513	611.84	816	306	0.275	-1.862	0.000727128	0.0416484	0.1178	0.0668
SEC31A	687	715	841	151	472	768	802	772	139	456	587.22	781	298	0.322	-1.634	0.000659006	0.0399285	0.0954	0.0665
SETD2	1031	1277	1493	424	716	1152	1432	1370	389	692	1007.08	1318	540	0.371	-1.43	0.000538899	0.036394	0.0762	0.0735
SETD8	179	260	264	17	138	200	292	242	16	133	176.57	245	74	0.184	-2.44	0.0006159	0.0391251	0.1719	0.0882
SH3BP5	1191	1417	1747	346	938	1331	1589	1603	318	907	1149.47	1508	612	0.337	-1.568	0.00074869	0.0422405	0.0927	0.0757
SHMT2	212	1933	2189	1005	595	237	2167	2008	923	575	1182.07	1471	749	0.349	-1.517	0.00018252	0.0193108	0.0742	0.0762
SHOX2	10447	7912	11195	2340	5279	11676	8871	10270	2148	5106	7614.17	10272	3627	0.347	-1.527	0.000718639	0.0416484	0.0909	0.0959
SLC16A9	239	404	541	194	209	267	453	496	178	202	319.32	405	190	0.4	-1.321	0.000384058	0.0301546	0.0611	0.0705
SLC1A5	60	617	761	221	83	67	692	698	203	80	348.02	486	142	0.186	-2.43	3.94947e-08	4.22655e-05	0.0786	0.0689
SLC39A7	10	9	34	1	4	11	10	31	1	4	11.45	17	2	0.118	-3.079	0.000788197	0.0435135	0.2048	0.2316
SLC4A10	188	258	333	25	98	210	289	305	23	95	184.52	268	59	0.163	-2.614	1.66043e-06	0.00100434	0.1115	0.0867
SLC7A3	66	639	1185	214	75	74	716	1087	196	73	429.26	626	134	0.137	-2.866	1.77578e-08	2.24588e-05	0.0975	0.0664
SLC7A5	98	1988	1770	926	366	110	2229	1624	850	354	1033.25	1321	602	0.289	-1.792	1.56841e-05	0.0046799	0.0757	0.0739
SLC7A8	15	2	11	21	84	17	2	10	19	81	25.92	10	50	8.039	3.007	3.67618e-05	0.00700613	0.1466	0.152
SLCO1A2	535	451	375	37	147	598	506	344	34	142	324.75	483	88	0.172	-2.538	9.84224e-06	0.00365672	0.1196	0.0702
SLCO5A1	197	152	266	24	108	220	170	244	22	104	152.22	211	63	0.245	-2.029	0.000158742	0.0179546	0.1125	0.0933
SLX4IP	56	98	136	15	38	63	110	125	14	37	69.55	99	26	0.199	-2.331	3.47028e-05	0.00699688	0.1177	0.1133
SMC3	2372	2589	3042	421	1767	2651	2903	2791	386	1709	2087.99	2782	1048	0.286	-1.804	0.00104027	0.0499043	0.121	0.0845
SMC6	779	813	980	98	582	871	912	899	90	563	666.81	894	326	0.252	-1.987	0.000708185	0.0415309	0.1291	0.0676
SMDT1	35	70	70	12	15	39	78	64	11	15	41.47	60	13	0.18	-2.471	4.67644e-05	0.00832467	0.1279	0.1276
SNHG1	697	2713	2946	1100	865	779	3042	2703	1010	837	1673.95	2175	924	0.321	-1.641	6.12595e-05	0.00964129	0.076	0.0816
SNORD26	118	237	124	10	29	132	266	114	9	28	109.72	171	18	0.099	-3.338	1.05254e-06	0.000732149	0.1536	0.1033
SNORD50A	114	238	150	4	72	127	267	138	4	70	121.03	177	37	0.105	-3.253	0.000922385	0.0459936	0.2637	0.1006
SNRPA	304	212	133	620	340	340	238	122	569	329	319.49	233	449	2.537	1.343	0.000337083	0.0275853	0.0614	0.0705
SOGA3	963	994	1394	18	590	1076	1114	1279	17	571	811.35	1156	294	0.087	-3.515	0.000227997	0.0222001	0.2448	0.07
SP140	10	10	14	0	0	11	11	13	0	0	7.05	12	0	0.01	-6.601	2.69763e-05	0.00647058	0.2777	0.2958
SPSB4	202	163	115	1203	264	226	183	106	1104	255	374.74	172	680	3.852	1.945	6.81551e-06	0.00278875	0.0766	0.0678
SYCP2	92	160	217	24	100	103	179	199	22	97	120.01	160	60	0.254	-1.976	0.000553603	0.0368058	0.1265	0.1008
SYNE1	536	594	810	109	321	599	666	743	100	310	483.73	669	205	0.253	-1.983	9.13778e-06	0.00353124	0.0825	0.066
TACC3	477	362	314	955	840	533	406	288	877	812	583.23	409	844	2.467	1.303	0.000708436	0.0415309	0.0667	0.0665
TAF13	70	93	115	16	49	78	104	106	15	47	70.02	96	31	0.262	-1.931	0.000919594	0.0459936	0.1286	0.1131
TAGLN	151	329	222	1812	484	169	369	204	1663	468	574.56	247	1066	3.229	1.691	4.95642e-05	0.00851281	0.0751	0.0664
TCEA1	301	403	620	122	226	336	452	569	112	219	337.52	452	166	0.31	-1.69	1.40101e-05	0.00453275	0.0649	0.0695
TEAD2	431	367	133	1260	423	482	411	122	1157	409	516.19	338	783	3.062	1.615	2.08884e-05	0.00569802	0.063	0.066
TENM2	2542	2738	3403	421	1269	2841	3070	3122	386	1227	2129.31	3011	806	0.223	-2.165	1.36724e-05	0.00452882	0.1022	0.0847
TES	112	196	255	27	88	125	220	234	25	85	137.75	193	55	0.209	-2.259	3.04142e-05	0.00666312	0.1135	0.0966
TET2	1197	1331	1197	301	667	1338	1492	1098	276	645	969.93	1309	460	0.331	-1.596	0.000744808	0.0422405	0.0945	0.0728
TIMM44	257	536	760	192	307	287	601	697	176	297	411.71	528	236	0.354	-1.498	7.20549e-05	0.0111381	0.0626	0.0667
TLR9	7	11	25	0	1	8	12	23	0	1	8.81	14	0	0.033	-4.943	3.00221e-05	0.00666312	0.2434	0.2647
TMED8	86	89	74	10	30	96	100	68	9	29	60.4	88	19	0.211	-2.246	0.000515018	0.0351222	0.148	0.1165
TNIK	716	788	906	119	429	800	883	831	109	415	607.81	838	262	0.251	-1.994	8.80352e-05	0.0126262	0.1033	0.0668
TNS3	12	17	15	72	70	13	19	14	66	68	36.01	15	67	4.099	2.035	0.000571159	0.0371307	0.1261	0.1329
TP53I3	51	34	31	222	68	57	38	28	204	66	78.62	41	135	3.546	1.826	0.000810058	0.0441892	0.1142	0.1106
TPM2	73	56	18	232	60	82	63	17	213	58	86.38	54	136	3.435	1.78	0.0004341	0.0326443	0.0979	0.1086
TPX2	311	173	109	464	340	348	194	100	426	329	279.27	214	378	2.678	1.421	0.000314245	0.0263536	0.0671	0.0737
TRIM5	33	26	18	140	70	37	29	17	129	68	55.75	28	98	4.239	2.084	0.000145038	0.017008	0.1118	0.1182
TRIM66	182	1086	1098	374	368	203	1218	1007	343	356	625.51	809	350	0.316	-1.663	1.61101e-05	0.0046799	0.0661	0.067
TRIP11	841	903	1192	48	485	940	1012	1094	44	469	711.81	1015	256	0.141	-2.827	3.6763e-05	0.00700613	0.1584	0.0683
TTC3P1	506	568	677	16	374	566	637	621	15	362	439.97	608	188	0.126	-2.989	0.000749957	0.0422405	0.2219	0.0663
TTYH2	113	96	103	335	260	126	108	94	308	251	177.48	109	280	2.755	1.462	0.000709348	0.0415309	0.0802	0.0879
TXLNG	421	511	714	258	256	471	573	655	237	248	436.58	566	242	0.395	-1.339	0.000262371	0.0240139	0.0599	0.0663
TYMS	125	143	125	673	338	140	160	115	618	327	271.88	138	472	3.317	1.73	1.12339e-05	0.0039812	0.0661	0.0744
UBE2C	259	248	150	883	391	289	278	138	811	378	378.77	235	594	2.831	1.501	4.78704e-05	0.00832467	0.0596	0.0676
UHRF1BP1L	232	197	301	63	132	259	221	276	58	128	188.36	252	93	0.351	-1.511	0.000694672	0.0413003	0.0835	0.086
UNC5B	29	534	702	52	34	32	599	644	48	33	271.15	425	40	0.064	-3.957	4.86116e-19	3.38142e-15	0.068	0.0745
URI1	954	1198	1227	350	627	1066	1343	1126	321	606	892.55	1178	464	0.36	-1.476	0.000588413	0.0378982	0.0808	0.0715
UTP23	235	261	371	61	174	263	293	340	56	168	223.98	299	112	0.312	-1.679	0.000279733	0.0249465	0.0882	0.0802
WARS	352	1139	1647	628	405	393	1277	1511	577	392	829.91	1060	484	0.342	-1.546	0.000133554	0.0160172	0.0729	0.0704
WDR70	259	303	393	60	227	289	340	361	55	220	252.87	330	138	0.321	-1.641	0.000920351	0.0459936	0.0987	0.0765
YARS	330	2351	2643	1204	691	369	2636	2425	1105	668	1440.59	1810	886	0.34	-1.556	0.000161621	0.0180924	0.0767	0.0794
ZC3H13	3929	3800	3908	228	2195	4391	4260	3585	209	2123	2913.82	4079	1166	0.172	-2.543	0.00072651	0.0416484	0.1849	0.0881
ZC3H8	370	455	637	74	277	414	510	584	68	268	368.78	503	168	0.251	-1.992	2.57004e-05	0.00638472	0.0902	0.068
ZFYVE9	249	335	454	55	203	278	376	417	50	196	263.44	357	123	0.257	-1.959	5.61539e-05	0.00922946	0.0943	0.0753
ZMAT1	499	627	788	84	431	558	703	723	77	417	495.51	661	247	0.256	-1.967	0.000278935	0.0249465	0.1129	0.066
ZNF397	535	642	619	77	276	598	720	568	71	267	444.64	629	169	0.218	-2.195	2.87282e-05	0.00666111	0.106	0.0662
ZNF462	1186	1201	1453	214	828	1326	1347	1333	196	801	1000.46	1335	498	0.298	-1.747	0.000681809	0.041062	0.1073	0.0733
ZNF608	1445	1669	1868	136	1058	1615	1871	1714	125	1023	1269.61	1733	574	0.202	-2.31	0.000630688	0.0397019	0.1595	0.0774
ZNF638	1524	1531	1835	140	847	1703	1716	1683	129	819	1210.19	1701	474	0.193	-2.375	9.12809e-05	0.0126899	0.1358	0.0766
ZNF790	66	37	64	1	23	74	41	59	1	22	39.42	58	12	0.155	-2.69	0.000630144	0.0397019	0.1945	0.1296
ZNF808	22	27	32	0	10	25	30	29	0	10	18.78	28	5	0.121	-3.051	0.000966912	0.0478434	0.2438	0.1802

## Sheet: Up-regulated in HG
Id	X20mM_n.10	X20mM_n.11	X20mM_n.12	X100mM_n.11	X100mM_n.12	norm.20mM_n.10	norm.20mM_n.11	norm.20mM_n.12	norm.100mM_n.11	norm.100mM_n.12	baseMean	X20mM	X100mM	FC	log2FoldChange	pvalue	padj	tagwise.dispersion	trended.dispersion
ACAT2	1396	240	378	935	1346	1560	269	347	858	1302	867.24	725	1080	3.461	1.791	4.60201e-06	0.0021341	0.0673	0.071
ACSBG1	39	16	19	86	77	44	18	17	79	74	46.48	26	76	4.312	2.108	0.000228192	0.0222001	0.119	0.1233
ACTA2	152	201	84	747	477	170	225	77	686	461	323.87	157	574	4.229	2.08	4.37364e-07	0.000338034	0.0702	0.0702
ARHGAP31	86	80	45	331	107	96	90	41	304	103	126.89	76	204	2.928	1.55	0.00087581	0.0452058	0.0891	0.0991
B9D1	9	7	7	47	39	10	8	6	43	38	21.04	8	40	5.6	2.486	0.000285117	0.0251047	0.1473	0.1679
BEST3	19	3	2	26	25	21	3	2	24	24	14.9	9	24	9.079	3.183	0.000184734	0.0193235	0.1821	0.2021
BIRC5	194	109	66	368	213	217	122	61	338	206	188.68	133	272	3.056	1.612	0.000162811	0.0180924	0.0769	0.0859
BVES	12	11	7	56	34	13	12	6	51	33	23.29	10	42	4.536	2.181	0.00102944	0.0495555	0.1456	0.1598
CALR	1171	743	944	4093	1669	1309	833	866	3757	1614	1675.87	1003	2686	2.899	1.536	0.000817913	0.0441892	0.0921	0.0816
CCL2	4	7	21	121	47	4	8	19	111	45	37.62	10	78	5.394	2.431	0.000745317	0.0422405	0.1758	0.1307
CCNB1	95	46	56	254	187	106	52	51	233	181	124.63	70	207	3.979	1.993	2.29256e-05	0.00595091	0.0892	0.0996
CCNB2	123	71	47	316	176	137	80	43	290	170	144.1	87	230	3.783	1.92	3.01908e-05	0.00666312	0.0863	0.0951
CD58	39	28	14	123	73	44	31	13	113	71	54.27	29	92	4.363	2.125	0.000163862	0.0180924	0.1174	0.1189
CD9	10	8	18	97	52	11	9	17	89	50	35.2	12	70	5.265	2.396	0.00026051	0.0240014	0.1481	0.1338
CDC45	27	16	5	75	47	30	18	5	69	45	33.4	18	57	5.688	2.508	0.000125814	0.0154896	0.141	0.1367
CDCA5	29	50	22	205	73	32	56	20	188	71	73.49	36	130	3.412	1.771	0.000533471	0.0362032	0.1019	0.112
CENPA	11	11	7	61	37	12	12	6	56	36	24.57	10	46	4.938	2.304	0.000477446	0.0345421	0.1429	0.1557
CFAP126	46	18	11	101	55	51	20	10	93	53	45.52	27	73	4.864	2.282	0.000111612	0.0140427	0.1222	0.124
CNN1	15	22	16	146	54	17	25	15	134	52	48.47	19	93	4.421	2.144	0.000183225	0.0193108	0.1193	0.1219
CNN2	704	771	404	2572	905	787	864	371	2361	875	1051.64	674	1618	2.541	1.345	0.000552084	0.0368058	0.0691	0.0742
COL1A1	19	26	3	136	25	21	29	3	125	24	40.43	18	74	5.402	2.434	0.000153391	0.0176361	0.1323	0.1281
COL27A1	353	274	147	588	531	395	307	135	540	514	377.98	279	527	2.575	1.365	0.000819622	0.0441892	0.0719	0.0677
CSRP2	139	130	83	441	266	155	146	76	405	257	207.87	126	331	3.055	1.611	9.70117e-05	0.0128536	0.0727	0.0826
CTGF	83	192	270	1307	413	93	215	248	1200	399	430.99	185	800	2.998	1.584	0.000713477	0.0415309	0.0904	0.0664
CYP51A1	694	313	666	1247	1301	776	351	611	1145	1258	828.11	579	1202	2.588	1.372	0.000546627	0.0367376	0.0708	0.0703
DEPDC1B	28	23	17	116	57	31	26	16	106	55	46.86	24	80	3.815	1.932	0.000653694	0.0399285	0.119	0.123
E2F2	58	65	27	199	107	65	73	25	183	103	89.73	54	143	3.185	1.671	0.000864753	0.0450578	0.1008	0.1078
EEF1D	22	12	5	703	15	25	13	5	645	15	140.5	14	330	17.144	4.1	2.56056e-07	0.000209544	0.1457	0.0958
EFS	51	68	18	231	71	57	76	17	212	69	86.1	50	140	3.323	1.732	0.000660117	0.0399285	0.1009	0.1087
EPPK1	51	40	20	147	74	57	45	18	135	72	65.34	40	104	3.389	1.761	0.000833589	0.0442687	0.1071	0.1145
FAM64A	61	30	23	140	146	68	34	21	129	141	78.53	41	135	5.015	2.326	1.33347e-05	0.00452469	0.1072	0.1106
FDFT1	1384	377	526	1240	1357	1547	423	483	1138	1312	980.56	818	1225	2.706	1.436	0.000202467	0.0208431	0.0677	0.073
FDPS	1359	329	408	790	1229	1519	369	374	725	1189	835.18	754	957	2.5	1.322	0.000901525	0.0459936	0.0711	0.0705
FLJ16779	159	96	24	248	115	178	108	22	228	111	129.25	103	170	3.16	1.66	0.00101507	0.0492042	0.1018	0.0986
FOXJ1	58	73	102	498	400	65	82	94	457	387	216.85	80	422	4.792	2.261	7.33235e-08	7.28626e-05	0.0719	0.0811
FOXN4	41	32	22	188	119	46	36	20	173	115	77.91	34	144	5.202	2.379	5.04681e-06	0.00226488	0.1022	0.1108
FRZB	170	96	68	339	173	190	108	62	311	167	167.71	120	239	2.784	1.477	0.000782215	0.0433553	0.0818	0.0899
GJA1	219	153	130	543	389	245	172	119	498	376	282.05	179	437	3.025	1.597	3.26811e-05	0.00678596	0.0637	0.0734
GPC4	233	251	179	756	475	260	281	164	694	459	371.89	235	576	2.624	1.392	0.000171827	0.0186754	0.0606	0.0679
HSPA2	6	8	6	49	39	7	9	6	45	38	20.78	7	42	5.738	2.521	0.000252807	0.0236044	0.1492	0.1689
IFIT1	90	38	14	152	68	101	43	13	140	66	72.27	52	103	3.992	1.997	0.000182651	0.0193108	0.1057	0.1124
IGFBP7	18	23	3	126	20	20	26	3	116	19	36.73	16	68	5.142	2.362	0.000251811	0.0236044	0.1291	0.132
INSM1	121	155	231	929	410	135	174	212	853	397	354.06	174	625	3.026	1.597	0.000230784	0.0222963	0.0793	0.0686
ITGB5	338	346	208	848	582	378	388	191	778	563	459.57	319	670	2.428	1.28	0.000713145	0.0415309	0.0637	0.0661
KIF20A	26	13	27	151	62	29	15	25	139	60	53.4	23	100	4.668	2.223	0.000500332	0.034816	0.1464	0.1192
KIF2C	33	33	37	156	114	37	37	34	143	110	72.26	36	126	3.536	1.822	0.000345826	0.0279717	0.1025	0.1123
KLHL1	7	12	41	80	108	8	13	38	73	104	47.36	20	88	3.757	1.91	0.000944098	0.0469082	0.1258	0.1226
LGI2	126	80	110	160	917	141	90	101	147	887	273.03	111	517	3.845	1.943	0.000485893	0.034816	0.1163	0.0743
LINC00261	3	0	0	13	10	3	0	0	12	10	4.99	1	11	86.528	6.435	9.94298e-05	0.0130497	0.3147	0.3345
LSM14A	49	7	8	95	28	55	8	7	87	27	36.85	23	57	6.431	2.685	7.58976e-05	0.011477	0.1401	0.1321
MEST	190	213	365	1026	613	212	239	335	942	593	464.15	262	768	2.637	1.399	0.000755741	0.0423946	0.0751	0.0661
MIF	123	26	22	178	253	137	29	20	163	245	118.98	62	204	8.189	3.034	1.30835e-08	1.82018e-05	0.1011	0.101
MVK	348	69	115	249	279	389	77	106	229	270	214.04	191	250	2.743	1.456	0.000400919	0.0311597	0.0714	0.0817
MYRF	16	26	13	134	42	18	29	12	123	41	44.52	20	82	3.807	1.929	0.000894217	0.0459053	0.1228	0.1246
NEUROG1	55	15	8	134	38	61	17	7	123	37	49.08	28	80	6.126	2.615	1.65186e-05	0.00468995	0.1193	0.1217
NEUROG2	8	3	2	45	12	9	3	2	41	12	13.41	5	26	8.919	3.157	0.000333402	0.0275853	0.1895	0.2119
NPTX2	134	89	88	344	209	150	100	81	316	202	169.64	110	259	2.814	1.493	0.000687733	0.0410632	0.0823	0.0895
PHF1	12	2	9	217	18	13	2	8	199	17	48.1	8	108	11.229	3.489	0.000583826	0.0377776	0.26	0.122
PIF1	46	23	7	115	48	51	26	6	106	46	47.12	28	76	5.175	2.372	8.1804e-05	0.0121917	0.1246	0.1229
PLK1	232	193	122	858	258	259	216	112	788	250	324.95	196	519	2.862	1.517	0.000106272	0.0135638	0.0656	0.0702
PPP1R17	17	2	2	27	18	19	2	2	25	17	13.05	8	21	9.717	3.28	0.00025846	0.0239713	0.1927	0.2164
PTTG1	515	398	218	1131	512	576	446	200	1038	495	551.05	407	766	2.399	1.262	0.000822672	0.0441892	0.0641	0.0662
RPS17	49	153	42	2625	1039	55	172	39	2410	1005	735.88	89	1708	18.799	4.233	3.63147e-20	5.0521e-16	0.0742	0.0687
RRM2	171	105	54	430	194	191	118	50	395	188	188.15	120	292	3.552	1.829	2.30987e-05	0.00595091	0.0772	0.086
S1PR3	16	11	14	97	43	18	12	13	89	42	34.74	14	66	4.799	2.263	0.000337013	0.0275853	0.137	0.1345
SAPCD2	115	69	59	270	147	129	77	54	248	142	130.01	87	195	2.901	1.537	0.000857067	0.0449493	0.0885	0.0984
SCARA3	261	193	87	539	279	292	216	80	495	270	270.51	196	382	2.764	1.467	0.000214321	0.0217318	0.0673	0.0745
SLC7A8	15	2	11	21	84	17	2	10	19	81	25.92	10	50	8.039	3.007	3.67618e-05	0.00700613	0.1466	0.152
SNRPA	304	212	133	620	340	340	238	122	569	329	319.49	233	449	2.537	1.343	0.000337083	0.0275853	0.0614	0.0705
SPSB4	202	163	115	1203	264	226	183	106	1104	255	374.74	172	680	3.852	1.945	6.81551e-06	0.00278875	0.0766	0.0678
TACC3	477	362	314	955	840	533	406	288	877	812	583.23	409	844	2.467	1.303	0.000708436	0.0415309	0.0667	0.0665
TAGLN	151	329	222	1812	484	169	369	204	1663	468	574.56	247	1066	3.229	1.691	4.95642e-05	0.00851281	0.0751	0.0664
TEAD2	431	367	133	1260	423	482	411	122	1157	409	516.19	338	783	3.062	1.615	2.08884e-05	0.00569802	0.063	0.066
TNS3	12	17	15	72	70	13	19	14	66	68	36.01	15	67	4.099	2.035	0.000571159	0.0371307	0.1261	0.1329
TP53I3	51	34	31	222	68	57	38	28	204	66	78.62	41	135	3.546	1.826	0.000810058	0.0441892	0.1142	0.1106
TPM2	73	56	18	232	60	82	63	17	213	58	86.38	54	136	3.435	1.78	0.0004341	0.0326443	0.0979	0.1086
TPX2	311	173	109	464	340	348	194	100	426	329	279.27	214	378	2.678	1.421	0.000314245	0.0263536	0.0671	0.0737
TRIM5	33	26	18	140	70	37	29	17	129	68	55.75	28	98	4.239	2.084	0.000145038	0.017008	0.1118	0.1182
TTYH2	113	96	103	335	260	126	108	94	308	251	177.48	109	280	2.755	1.462	0.000709348	0.0415309	0.0802	0.0879
TYMS	125	143	125	673	338	140	160	115	618	327	271.88	138	472	3.317	1.73	1.12339e-05	0.0039812	0.0661	0.0744
UBE2C	259	248	150	883	391	289	278	138	811	378	378.77	235	594	2.831	1.501	4.78704e-05	0.00832467	0.0596	0.0676

## Sheet: Down-regulated in HG
Id	X20mM_n.10	X20mM_n.11	X20mM_n.12	X100mM_n.11	X100mM_n.12	norm.20mM_n.10	norm.20mM_n.11	norm.20mM_n.12	norm.100mM_n.11	norm.100mM_n.12	baseMean	X20mM	X100mM	FC	log2FoldChange	pvalue	padj	tagwise.dispersion	trended.dispersion
ADAM20	18	22	35	2	7	20	25	32	2	7	17.1	26	4	0.144	-2.796	0.000373796	0.0295469	0.176	0.1888
ADGRA1-AS1	39	32	29	5	7	44	36	27	5	7	23.49	36	6	0.186	-2.428	0.000687426	0.0410632	0.1535	0.1611
ADM2	2	165	151	92	15	2	185	139	84	15	84.94	109	50	0.233	-2.104	0.000488701	0.034816	0.1373	0.109
AGPAT1	14	516	129	31	13	16	579	118	28	13	150.71	238	20	0.07	-3.842	1.90041e-12	6.60964e-09	0.0958	0.0938
AKAP9	7197	7085	9371	740	5308	8044	7943	8597	679	5134	6079.43	8195	2906	0.226	-2.143	0.000798929	0.0439316	0.1504	0.0942
ALG11	80	48	77	0	20	89	54	71	0	19	46.64	71	10	0.096	-3.374	6.16788e-05	0.00964129	0.2102	0.1235
ALMS1P	14	16	22	0	2	16	18	20	0	2	11.14	18	1	0.053	-4.245	5.97118e-05	0.00964129	0.2315	0.2373
ANKRD11	5011	9525	12589	844	4387	5601	10679	11549	775	4243	6569.3	9276	2509	0.164	-2.612	8.78356e-06	0.00349134	0.1311	0.0948
ANKRD26	1165	1171	1575	143	927	1302	1313	1445	131	897	1017.54	1353	514	0.252	-1.99	0.000727471	0.0416484	0.1309	0.0736
ANKRD36	637	412	552	65	299	712	462	506	60	289	405.82	560	174	0.277	-1.85	0.000279374	0.0249465	0.102	0.0669
ANO4	33	29	38	0	7	37	33	35	0	7	22.21	35	4	0.084	-3.573	3.87026e-05	0.00717908	0.1997	0.1654
ASH1L	1506	1450	2072	202	910	1683	1626	1901	185	880	1255.06	1737	532	0.231	-2.112	6.14554e-05	0.00964129	0.1111	0.0772
ASNS	880	4372	4540	2271	1358	984	4902	4165	2085	1313	2689.68	3350	1699	0.366	-1.449	0.000409423	0.0316438	0.0769	0.0873
ASS1	14	66	113	6	10	16	74	104	6	10	41.7	65	8	0.085	-3.549	3.37692e-08	3.91498e-05	0.1267	0.1272
ATE1-AS1	65	99	130	7	60	73	111	119	6	58	73.47	101	32	0.192	-2.379	0.000781404	0.0433553	0.1732	0.1121
ATF5	235	1433	1204	232	285	263	1607	1105	213	276	692.49	992	244	0.182	-2.457	6.43094e-09	9.94081e-06	0.0744	0.068
ATXN2L	49	131	230	25	68	55	147	211	23	66	100.27	138	44	0.226	-2.148	3.15796e-05	0.00666312	0.1045	0.1054
BEND6	79	164	431	72	101	88	184	395	66	98	166.27	222	82	0.297	-1.751	0.000104688	0.0135638	0.0851	0.0902
BICD1	460	434	621	24	299	514	487	570	22	289	376.32	524	156	0.161	-2.633	0.000136571	0.0162391	0.1587	0.0677
BMS1P21	50	51	57	0	19	56	57	52	0	18	36.75	55	9	0.105	-3.256	0.000367993	0.0292544	0.2426	0.1327
BMS1P4	123	114	139	14	55	137	128	128	13	53	91.77	131	33	0.217	-2.202	0.000215569	0.0217318	0.1309	0.1074
BNC2	478	198	208	79	74	534	222	191	73	72	218.23	316	72	0.35	-1.513	0.000246386	0.0234776	0.0705	0.0811
C10orf12	151	162	138	6	52	169	182	127	6	50	106.56	159	28	0.129	-2.958	0.000124335	0.0154441	0.1909	0.104
C11orf63	20	35	40	3	8	22	39	37	3	8	21.76	33	6	0.134	-2.895	9.01604e-05	0.0126899	0.162	0.1668
C1orf27	332	429	627	125	354	371	481	575	115	342	376.87	476	228	0.38	-1.396	0.000991219	0.0484388	0.0768	0.0677
CACNG2	212	195	285	35	139	237	219	261	32	134	176.72	239	83	0.283	-1.821	0.000564473	0.0371307	0.1107	0.0882
CADM2	833	1239	1417	336	635	931	1389	1300	308	614	908.53	1207	461	0.325	-1.624	0.000129848	0.0157082	0.0787	0.0718
CARS	153	716	1287	201	240	171	803	1181	185	232	514.22	718	208	0.213	-2.234	6.13545e-09	9.94081e-06	0.0626	0.066
CCDC144B	79	118	121	1	52	88	132	111	1	50	76.56	110	26	0.102	-3.299	0.000778796	0.0433553	0.2684	0.1113
CCDC144CP	105	97	123	2	43	117	109	113	2	42	76.47	113	22	0.116	-3.113	0.000145482	0.017008	0.2083	0.1113
CCDC168	15	17	15	0	3	17	19	14	0	3	10.5	17	2	0.088	-3.505	0.000907941	0.0459936	0.2638	0.2455
CCDC171	79	81	138	7	58	88	91	127	6	56	73.65	102	31	0.202	-2.305	0.000475932	0.0345421	0.1542	0.112
CCDC175	23	33	70	6	20	26	37	64	6	19	30.35	42	12	0.225	-2.15	0.000803574	0.0440131	0.14	0.1422
CCDC30	131	182	198	16	104	146	204	182	15	101	129.48	177	58	0.214	-2.225	0.000877342	0.0452058	0.1587	0.0986
CCDC66	679	931	1114	286	571	759	1044	1022	263	552	727.89	942	408	0.37	-1.436	0.00065921	0.0399285	0.0781	0.0686
CCSER1	80	86	121	13	47	89	96	111	12	45	70.85	99	28	0.238	-2.072	0.000420419	0.0321366	0.1286	0.1129
CEP290	1881	1813	2082	113	1202	2102	2033	1910	104	1162	1462.25	2015	633	0.179	-2.486	0.000814359	0.0441892	0.1809	0.0796
CEP350	1322	1511	1938	354	1066	1478	1694	1778	325	1031	1261.1	1650	678	0.335	-1.58	0.000969799	0.0478434	0.0976	0.0773
CEP89	371	305	374	41	188	415	342	343	38	182	263.84	367	110	0.249	-2.004	0.000174688	0.0188392	0.1094	0.0753
CFAP43	33	58	145	20	35	37	65	133	18	34	57.43	78	26	0.268	-1.898	0.000443316	0.0329809	0.1111	0.1175
CHAC1	197	5089	5151	1747	2341	220	5706	4726	1604	2264	2903.82	3551	1934	0.367	-1.446	0.000642781	0.0399285	0.0813	0.0881
CNTNAP5	194	173	371	33	193	217	194	340	30	187	193.62	250	108	0.304	-1.719	0.000834559	0.0442687	0.1056	0.085
COX16	86	56	67	0	8	96	63	61	0	8	45.62	73	4	0.053	-4.248	1.47905e-07	0.000128603	0.172	0.1243
CREG2	135	165	196	11	94	151	185	180	10	91	123.34	172	50	0.184	-2.445	0.000505523	0.034816	0.1698	0.1
DAB1	95	90	129	1	34	106	101	118	1	33	71.85	108	17	0.091	-3.461	2.30442e-05	0.00595091	0.2038	0.1126
DDX59	32	39	71	2	22	36	44	65	2	21	33.55	48	12	0.158	-2.662	0.000299811	0.0258913	0.1752	0.1368
DHX36	1958	1817	2394	261	1398	2188	2037	2196	240	1352	1602.69	2140	796	0.271	-1.886	0.000984886	0.048416	0.1279	0.081
DNAH14	241	238	329	57	160	269	267	302	52	155	209.02	279	104	0.322	-1.634	0.000471859	0.0345421	0.09	0.0825
DNAJC21	384	380	535	110	295	429	426	491	101	285	346.46	449	193	0.375	-1.417	0.000904517	0.0459936	0.0776	0.069
EEA1	666	681	906	61	530	744	764	831	56	513	581.52	780	284	0.218	-2.198	0.000645048	0.0399285	0.1471	0.0665
EGFL6	6	29	107	10	10	7	33	98	9	10	31.25	46	10	0.165	-2.602	0.000112042	0.0140427	0.1472	0.1401
EIF4EBP1	54	455	470	140	127	60	510	431	129	123	250.6	334	126	0.268	-1.899	1.409e-06	0.00093343	0.0657	0.0767
EML5	34	26	37	0	6	38	29	34	0	6	21.38	34	3	0.079	-3.657	2.55079e-05	0.00638472	0.1925	0.1686
ESF1	564	621	955	135	437	630	696	876	124	423	549.86	734	274	0.295	-1.759	8.32528e-05	0.0121917	0.0841	0.0662
ESR2	9	20	15	0	2	10	22	14	0	2	9.64	15	1	0.059	-4.085	0.000203756	0.0208431	0.2607	0.2561
F10	5	10	9	0	0	6	11	8	0	0	5.01	8	0	0.013	-6.304	0.000128228	0.0156483	0.319	0.3406
FAM129A	3	52	116	13	5	3	58	106	12	5	36.97	56	8	0.104	-3.259	3.47202e-06	0.00178899	0.1558	0.1319
FAM13C	313	450	382	87	188	350	505	350	80	182	293.3	402	131	0.289	-1.79	0.000152759	0.0176361	0.0907	0.0725
FAM171B	54	86	86	7	36	60	96	79	6	35	55.38	78	20	0.191	-2.385	0.000648707	0.0399285	0.1695	0.1186
FAM184A	484	492	626	164	317	541	552	574	151	307	424.8	556	229	0.383	-1.383	0.000493349	0.034816	0.0687	0.0665
FBXO25	348	312	398	114	183	389	350	365	105	177	277.1	368	141	0.382	-1.387	0.000512471	0.0351207	0.0688	0.0739
FIGN	304	245	247	33	96	340	275	227	30	93	192.84	281	62	0.218	-2.195	3.37885e-05	0.00691273	0.1078	0.0852
FILIP1L	82	115	155	11	63	92	129	142	10	61	86.76	121	36	0.2	-2.325	0.000251115	0.0236044	0.1458	0.1086
FOXP1	476	506	661	274	268	532	567	606	252	259	443.29	568	256	0.435	-1.199	0.000992313	0.0484388	0.0595	0.0662
FSIP2	1049	949	1358	58	520	1172	1064	1246	53	503	807.68	1161	278	0.146	-2.778	1.61469e-05	0.0046799	0.145	0.07
GABRA3	14	20	28	0	5	16	22	26	0	5	13.72	21	2	0.087	-3.517	0.000227081	0.0222001	0.2342	0.2125
GCC2	689	811	972	100	548	770	909	892	92	530	638.57	857	311	0.248	-2.009	0.000451648	0.033422	0.1243	0.0672
GPATCH8	1496	1653	2253	327	1183	1672	1853	2067	300	1144	1407.3	1864	722	0.301	-1.734	0.000495603	0.034816	0.1034	0.079
GTF2I	100	91	94	6	41	112	102	86	6	40	69.04	100	23	0.182	-2.459	0.000570379	0.0371307	0.1729	0.1135
HERC2	200	61	152	3	42	224	68	139	3	41	94.95	144	22	0.143	-2.809	1.44424e-05	0.00456641	0.1399	0.1067
HIST1H1C	283	416	529	201	228	316	466	485	185	221	334.61	422	203	0.424	-1.237	0.00083271	0.0442687	0.0608	0.0696
HIST1H1E	29	37	56	0	13	32	41	51	0	13	27.57	41	6	0.095	-3.402	8.31756e-05	0.0121917	0.2169	0.1487
HIST1H4C	1013	1492	1464	16	496	1132	1673	1343	15	480	928.49	1383	248	0.061	-4.046	9.48639e-05	0.0126899	0.2703	0.0721
HMOX1	14	71	229	17	25	16	80	210	16	24	69.02	102	20	0.149	-2.748	7.97677e-07	0.000584067	0.1099	0.1133
HRK	57	55	143	10	30	64	62	131	9	29	58.95	86	19	0.187	-2.418	1.84639e-05	0.00513739	0.1129	0.1169
IFT74	158	126	204	33	82	177	141	187	30	79	122.92	168	54	0.307	-1.705	0.00055558	0.0368058	0.0985	0.1001
JMJD1C	765	936	1224	272	656	855	1049	1123	250	634	782.29	1009	442	0.368	-1.443	0.000920641	0.0459936	0.0827	0.0695
JMY	536	641	819	124	362	599	719	751	114	350	506.6	690	232	0.274	-1.867	3.61815e-05	0.00700613	0.0847	0.066
JPH4	880	979	1394	263	555	984	1098	1279	241	537	827.64	1120	389	0.305	-1.715	3.52859e-05	0.00700613	0.0751	0.0703
KCNB1	180	221	303	12	142	201	248	278	11	137	175.06	242	74	0.164	-2.608	0.000313214	0.0263536	0.1752	0.0885
KCNH7	18	20	23	0	3	20	22	21	0	3	13.31	21	2	0.066	-3.932	7.54857e-05	0.011477	0.2251	0.2167
KIAA1551	383	369	471	37	223	428	414	432	34	216	304.7	425	125	0.21	-2.25	8.51847e-05	0.0123447	0.1213	0.0716
KLF3	330	471	630	97	283	369	528	578	89	274	367.52	492	182	0.286	-1.807	4.74507e-05	0.00832467	0.0818	0.068
KLF3-AS1	57	57	74	8	22	64	64	68	7	21	44.82	65	14	0.201	-2.316	0.000236799	0.0227196	0.1387	0.1248
KLHDC7B	4	36	41	1	0	4	40	38	1	0	16.67	27	0	0.015	-6.066	6.26277e-09	9.94081e-06	0.18	0.1914
KPNA5	435	438	493	68	280	486	491	452	62	271	352.55	476	166	0.281	-1.83	0.000442987	0.0329809	0.1061	0.0687
LARS	706	1395	1995	566	618	789	1564	1830	520	598	1060.12	1394	559	0.329	-1.602	4.09193e-05	0.00739311	0.0688	0.0743
LGI4	72	105	109	6	49	80	118	100	6	47	70.22	99	26	0.173	-2.53	0.000653762	0.0399285	0.1847	0.1131
LINC00324	164	97	424	42	82	183	109	389	39	79	159.78	227	59	0.266	-1.912	5.63905e-05	0.00922946	0.0899	0.0916
LOC101927550	105	163	131	11	61	117	183	120	10	59	97.88	140	34	0.18	-2.478	0.00050448	0.034816	0.1734	0.106
LOC101928673	32	59	70	11	21	36	66	64	10	20	39.31	55	15	0.226	-2.146	0.000460403	0.0338896	0.1344	0.1296
LOC339529	10	6	27	0	3	11	7	25	0	3	9.11	14	2	0.088	-3.51	0.00102431	0.0494799	0.2444	0.2597
LOC440910	55	81	92	20	32	61	91	84	18	31	57.2	79	24	0.276	-1.858	0.000859439	0.0449493	0.1184	0.1177
LOC441204	197	259	314	66	110	220	290	288	61	106	193.12	266	84	0.279	-1.84	3.78059e-05	0.00710752	0.0826	0.0851
LOC728730	39	75	90	22	24	44	84	83	20	23	50.73	70	22	0.261	-1.937	0.000429809	0.0326443	0.1139	0.1209
LRIF1	549	569	1011	199	439	614	638	927	183	425	557.26	726	304	0.363	-1.461	0.000218144	0.0218332	0.0692	0.0663
LTN1	446	501	696	168	299	498	562	639	154	289	428.42	566	222	0.354	-1.499	9.4487e-05	0.0126899	0.0644	0.0664
LURAP1L-AS1	36	427	632	25	86	40	479	580	23	83	240.98	366	53	0.086	-3.535	7.31026e-13	3.39001e-09	0.0865	0.0779
LZIC	470	414	434	57	201	525	464	398	52	194	326.87	462	123	0.24	-2.061	5.17091e-05	0.00877288	0.1008	0.0701
MAP7D2	434	578	959	276	305	485	648	880	253	295	512.25	671	274	0.362	-1.466	9.21493e-05	0.0126899	0.0626	0.066
MBD5	414	345	362	45	205	463	387	332	41	198	284.24	394	120	0.26	-1.944	0.000479199	0.0345421	0.1172	0.0733
MEGF9	396	304	340	85	177	443	341	312	78	171	268.91	365	124	0.358	-1.484	0.000641612	0.0399285	0.0792	0.0747
MMP16	370	317	375	27	157	414	355	344	25	152	257.92	371	88	0.184	-2.44	2.77681e-05	0.00654762	0.123	0.0759
N4BP2	498	487	749	189	359	557	546	687	174	347	462.09	597	260	0.402	-1.315	0.000601849	0.0385849	0.0651	0.0661
N4BP2L2	1136	1487	2201	472	847	1270	1667	2019	433	819	1241.7	1652	626	0.325	-1.621	9.10577e-05	0.0126899	0.0768	0.077
NCOA2	194	201	331	5	124	217	225	304	5	120	174.07	249	62	0.111	-3.165	9.44847e-05	0.0126899	0.2027	0.0887
NCOA7	503	856	1363	222	450	562	960	1250	204	435	682.27	924	320	0.273	-1.875	3.41791e-06	0.00178899	0.0709	0.0678
NOC3L	115	131	175	35	60	129	147	161	32	58	105.22	146	45	0.284	-1.817	0.000276277	0.0249465	0.1003	0.1043
NOS1AP	201	354	354	111	165	225	397	325	102	160	241.56	316	131	0.356	-1.488	0.000350355	0.0281742	0.0739	0.0778
NPIPB11	3	227	12	3	2	3	255	11	3	2	54.71	90	2	0.027	-5.215	4.47566e-09	9.94081e-06	0.1412	0.1192
NSD1	607	687	775	224	345	678	770	711	206	334	539.79	720	270	0.355	-1.496	0.000194957	0.0202406	0.0709	0.0661
NUMA1	2097	2863	2363	1107	992	2344	3210	2168	1016	959	1939.41	2574	988	0.374	-1.418	0.000609172	0.0388752	0.078	0.0836
NUPR1	9	143	89	35	15	10	160	82	32	15	59.73	84	24	0.19	-2.392	1.14468e-05	0.0039812	0.1097	0.1167
ONECUT1	195	131	182	1	70	218	147	167	1	68	120.08	177	34	0.094	-3.416	0.000301494	0.0258913	0.2514	0.1008
PAPPA2	12	17	58	3	9	13	19	53	3	9	19.43	28	6	0.159	-2.65	0.00030821	0.0263056	0.1568	0.1754
PCDHA5	91	78	147	0	62	102	87	135	0	60	76.8	108	30	0.104	-3.259	0.000843012	0.0444242	0.2675	0.1112
PCDHGA12	31	20	33	0	7	35	22	30	0	7	18.82	29	4	0.105	-3.254	0.000226061	0.0222001	0.206	0.18
PCK2	13	249	396	69	38	15	279	363	63	37	151.42	219	50	0.153	-2.707	9.47015e-08	8.78325e-05	0.099	0.0934
PCLO	3838	3315	4247	353	2187	4290	3717	3896	324	2115	2868.33	3968	1220	0.218	-2.195	0.000314455	0.0263536	0.1391	0.088
PEX5L	24	138	242	40	41	27	155	222	37	40	95.99	135	38	0.206	-2.278	4.59897e-06	0.0021341	0.0967	0.1064
PHGDH	257	2797	3112	1135	615	287	3136	2855	1042	595	1582.96	2093	818	0.263	-1.925	6.10591e-06	0.0025741	0.0798	0.0808
PLCB1	293	384	582	75	202	327	431	534	69	195	311.23	431	132	0.245	-2.03	2.18321e-06	0.00124327	0.0755	0.0711
PLEKHA8P1	10	21	20	0	4	11	24	18	0	4	11.39	18	2	0.086	-3.532	0.000501218	0.034816	0.2597	0.2348
POTEE	135	246	239	9	79	151	276	219	8	76	146.12	215	42	0.115	-3.117	2.67533e-05	0.00647058	0.1794	0.0947
POTEF	137	233	302	2	74	153	261	277	2	72	152.96	230	37	0.064	-3.96	9.98815e-06	0.00365672	0.23	0.0932
POTEI	0	66	13	0	2	0	74	12	0	2	17.57	29	1	0.033	-4.918	4.49477e-06	0.0021341	0.2207	0.1884
POU6F2	10	9	15	0	1	11	10	14	0	1	7.2	12	0	0.048	-4.382	0.000385819	0.0301546	0.2719	0.2925
PRICKLE1	290	431	420	168	184	324	483	385	154	178	304.97	397	166	0.384	-1.38	0.000357842	0.0286109	0.0653	0.0716
PRKAR2A	100	168	152	6	69	112	188	139	6	67	102.36	146	36	0.14	-2.842	0.000503214	0.034816	0.2094	0.105
PRRG3	15	15	25	0	4	17	17	23	0	4	12.08	19	2	0.087	-3.516	0.000339945	0.0276568	0.2348	0.2272
PUS7L	311	347	406	41	195	348	389	372	38	189	267.07	370	114	0.228	-2.13	0.000105817	0.0135638	0.1142	0.0749
PWAR1	35	25	51	1	6	39	28	47	1	6	24.13	38	4	0.084	-3.575	5.65115e-06	0.00245684	0.1601	0.1583
PYCR1	318	1269	1418	327	448	355	1423	1301	300	433	762.5	1026	366	0.265	-1.914	2.23417e-06	0.00124327	0.0714	0.0692
RBBP8	171	370	545	152	242	191	415	500	140	234	295.9	369	187	0.398	-1.33	0.000567099	0.0371307	0.0655	0.0723
RBM12B	317	250	483	88	220	354	280	443	81	213	274.25	359	147	0.375	-1.415	0.000433259	0.0326443	0.0693	0.0742
RBM27	900	951	1561	287	840	1006	1066	1432	263	812	916.01	1168	538	0.376	-1.412	0.00101253	0.0492042	0.081	0.0719
RGS7BP	45	61	72	5	24	50	68	66	5	23	42.51	61	14	0.174	-2.519	0.000293887	0.0255535	0.1646	0.1267
RHEBL1	11	61	130	11	29	12	68	119	10	28	47.62	66	19	0.192	-2.382	3.98721e-05	0.00729869	0.1214	0.1226
RN7SL1	206	139	351	29	117	230	156	322	27	113	169.57	236	70	0.252	-1.99	3.13147e-05	0.00666312	0.0912	0.0896
RN7SL2	89	63	257	10	50	99	71	236	9	48	92.68	135	28	0.17	-2.553	1.47616e-06	0.000933472	0.1004	0.1071
RNA18S5	47	72	100	9	23	53	81	92	8	22	51.1	75	15	0.165	-2.597	1.57701e-05	0.0046799	0.126	0.1207
RNA28S5	113	101	91	0	32	126	113	83	0	31	70.79	107	16	0.081	-3.62	0.000320394	0.0266905	0.2746	0.113
RNF115	617	651	940	93	501	690	730	862	85	485	570.35	761	285	0.26	-1.942	0.000288555	0.0252476	0.1123	0.0664
RNPC3	479	491	515	119	255	535	550	472	109	247	382.84	519	178	0.324	-1.625	0.00016658	0.0182477	0.0783	0.0675
RNU4ATAC	1029	1201	1532	25	630	1150	1347	1405	23	609	906.86	1301	316	0.091	-3.462	0.000157415	0.0179504	0.2329	0.0717
RNU6ATAC	6	12	157	6	20	7	13	144	6	19	37.81	55	12	0.208	-2.268	0.000876964	0.0452058	0.1411	0.1305
RPL17	138	599	1066	117	32	154	672	978	107	31	388.42	601	69	0.074	-3.761	1.2726e-11	3.54089e-08	0.1062	0.0673
RPL23AP53	18	44	15	10	2	20	49	14	9	2	18.86	28	6	0.173	-2.529	0.00083688	0.0442687	0.161	0.1806
SAMD1	108	194	150	4	72	121	218	138	4	70	109.83	159	37	0.116	-3.103	0.000909305	0.0459936	0.25	0.1032
SARS	1182	3189	3633	1082	1231	1321	3575	3333	993	1191	2082.64	2743	1092	0.315	-1.666	5.31015e-05	0.00890059	0.0768	0.0845
SBDS	170	223	373	38	140	190	250	342	35	135	190.5	261	85	0.241	-2.052	3.16106e-05	0.00666312	0.097	0.0856
SBDSP1	59	86	107	6	43	66	96	98	6	42	61.52	87	24	0.179	-2.48	0.00041321	0.0317601	0.1699	0.116
SCARNA9	224	200	183	3	74	250	224	168	3	72	143.36	214	38	0.098	-3.355	0.000283593	0.0251047	0.2421	0.0954
SCYL2	704	748	896	108	530	787	839	822	99	513	611.84	816	306	0.275	-1.862	0.000727128	0.0416484	0.1178	0.0668
SEC31A	687	715	841	151	472	768	802	772	139	456	587.22	781	298	0.322	-1.634	0.000659006	0.0399285	0.0954	0.0665
SETD2	1031	1277	1493	424	716	1152	1432	1370	389	692	1007.08	1318	540	0.371	-1.43	0.000538899	0.036394	0.0762	0.0735
SETD8	179	260	264	17	138	200	292	242	16	133	176.57	245	74	0.184	-2.44	0.0006159	0.0391251	0.1719	0.0882
SH3BP5	1191	1417	1747	346	938	1331	1589	1603	318	907	1149.47	1508	612	0.337	-1.568	0.00074869	0.0422405	0.0927	0.0757
SHMT2	212	1933	2189	1005	595	237	2167	2008	923	575	1182.07	1471	749	0.349	-1.517	0.00018252	0.0193108	0.0742	0.0762
SHOX2	10447	7912	11195	2340	5279	11676	8871	10270	2148	5106	7614.17	10272	3627	0.347	-1.527	0.000718639	0.0416484	0.0909	0.0959
SLC16A9	239	404	541	194	209	267	453	496	178	202	319.32	405	190	0.4	-1.321	0.000384058	0.0301546	0.0611	0.0705
SLC1A5	60	617	761	221	83	67	692	698	203	80	348.02	486	142	0.186	-2.43	3.94947e-08	4.22655e-05	0.0786	0.0689
SLC39A7	10	9	34	1	4	11	10	31	1	4	11.45	17	2	0.118	-3.079	0.000788197	0.0435135	0.2048	0.2316
SLC4A10	188	258	333	25	98	210	289	305	23	95	184.52	268	59	0.163	-2.614	1.66043e-06	0.00100434	0.1115	0.0867
SLC7A3	66	639	1185	214	75	74	716	1087	196	73	429.26	626	134	0.137	-2.866	1.77578e-08	2.24588e-05	0.0975	0.0664
SLC7A5	98	1988	1770	926	366	110	2229	1624	850	354	1033.25	1321	602	0.289	-1.792	1.56841e-05	0.0046799	0.0757	0.0739
SLCO1A2	535	451	375	37	147	598	506	344	34	142	324.75	483	88	0.172	-2.538	9.84224e-06	0.00365672	0.1196	0.0702
SLCO5A1	197	152	266	24	108	220	170	244	22	104	152.22	211	63	0.245	-2.029	0.000158742	0.0179546	0.1125	0.0933
SLX4IP	56	98	136	15	38	63	110	125	14	37	69.55	99	26	0.199	-2.331	3.47028e-05	0.00699688	0.1177	0.1133
SMC3	2372	2589	3042	421	1767	2651	2903	2791	386	1709	2087.99	2782	1048	0.286	-1.804	0.00104027	0.0499043	0.121	0.0845
SMC6	779	813	980	98	582	871	912	899	90	563	666.81	894	326	0.252	-1.987	0.000708185	0.0415309	0.1291	0.0676
SMDT1	35	70	70	12	15	39	78	64	11	15	41.47	60	13	0.18	-2.471	4.67644e-05	0.00832467	0.1279	0.1276
SNHG1	697	2713	2946	1100	865	779	3042	2703	1010	837	1673.95	2175	924	0.321	-1.641	6.12595e-05	0.00964129	0.076	0.0816
SNORD26	118	237	124	10	29	132	266	114	9	28	109.72	171	18	0.099	-3.338	1.05254e-06	0.000732149	0.1536	0.1033
SNORD50A	114	238	150	4	72	127	267	138	4	70	121.03	177	37	0.105	-3.253	0.000922385	0.0459936	0.2637	0.1006
SOGA3	963	994	1394	18	590	1076	1114	1279	17	571	811.35	1156	294	0.087	-3.515	0.000227997	0.0222001	0.2448	0.07
SP140	10	10	14	0	0	11	11	13	0	0	7.05	12	0	0.01	-6.601	2.69763e-05	0.00647058	0.2777	0.2958
SYCP2	92	160	217	24	100	103	179	199	22	97	120.01	160	60	0.254	-1.976	0.000553603	0.0368058	0.1265	0.1008
SYNE1	536	594	810	109	321	599	666	743	100	310	483.73	669	205	0.253	-1.983	9.13778e-06	0.00353124	0.0825	0.066
TAF13	70	93	115	16	49	78	104	106	15	47	70.02	96	31	0.262	-1.931	0.000919594	0.0459936	0.1286	0.1131
TCEA1	301	403	620	122	226	336	452	569	112	219	337.52	452	166	0.31	-1.69	1.40101e-05	0.00453275	0.0649	0.0695
TENM2	2542	2738	3403	421	1269	2841	3070	3122	386	1227	2129.31	3011	806	0.223	-2.165	1.36724e-05	0.00452882	0.1022	0.0847
TES	112	196	255	27	88	125	220	234	25	85	137.75	193	55	0.209	-2.259	3.04142e-05	0.00666312	0.1135	0.0966
TET2	1197	1331	1197	301	667	1338	1492	1098	276	645	969.93	1309	460	0.331	-1.596	0.000744808	0.0422405	0.0945	0.0728
TIMM44	257	536	760	192	307	287	601	697	176	297	411.71	528	236	0.354	-1.498	7.20549e-05	0.0111381	0.0626	0.0667
TLR9	7	11	25	0	1	8	12	23	0	1	8.81	14	0	0.033	-4.943	3.00221e-05	0.00666312	0.2434	0.2647
TMED8	86	89	74	10	30	96	100	68	9	29	60.4	88	19	0.211	-2.246	0.000515018	0.0351222	0.148	0.1165
TNIK	716	788	906	119	429	800	883	831	109	415	607.81	838	262	0.251	-1.994	8.80352e-05	0.0126262	0.1033	0.0668
TRIM66	182	1086	1098	374	368	203	1218	1007	343	356	625.51	809	350	0.316	-1.663	1.61101e-05	0.0046799	0.0661	0.067
TRIP11	841	903	1192	48	485	940	1012	1094	44	469	711.81	1015	256	0.141	-2.827	3.6763e-05	0.00700613	0.1584	0.0683
TTC3P1	506	568	677	16	374	566	637	621	15	362	439.97	608	188	0.126	-2.989	0.000749957	0.0422405	0.2219	0.0663
TXLNG	421	511	714	258	256	471	573	655	237	248	436.58	566	242	0.395	-1.339	0.000262371	0.0240139	0.0599	0.0663
UHRF1BP1L	232	197	301	63	132	259	221	276	58	128	188.36	252	93	0.351	-1.511	0.000694672	0.0413003	0.0835	0.086
UNC5B	29	534	702	52	34	32	599	644	48	33	271.15	425	40	0.064	-3.957	4.86116e-19	3.38142e-15	0.068	0.0745
URI1	954	1198	1227	350	627	1066	1343	1126	321	606	892.55	1178	464	0.36	-1.476	0.000588413	0.0378982	0.0808	0.0715
UTP23	235	261	371	61	174	263	293	340	56	168	223.98	299	112	0.312	-1.679	0.000279733	0.0249465	0.0882	0.0802
WARS	352	1139	1647	628	405	393	1277	1511	577	392	829.91	1060	484	0.342	-1.546	0.000133554	0.0160172	0.0729	0.0704
WDR70	259	303	393	60	227	289	340	361	55	220	252.87	330	138	0.321	-1.641	0.000920351	0.0459936	0.0987	0.0765
YARS	330	2351	2643	1204	691	369	2636	2425	1105	668	1440.59	1810	886	0.34	-1.556	0.000161621	0.0180924	0.0767	0.0794
ZC3H13	3929	3800	3908	228	2195	4391	4260	3585	209	2123	2913.82	4079	1166	0.172	-2.543	0.00072651	0.0416484	0.1849	0.0881
ZC3H8	370	455	637	74	277	414	510	584	68	268	368.78	503	168	0.251	-1.992	2.57004e-05	0.00638472	0.0902	0.068
ZFYVE9	249	335	454	55	203	278	376	417	50	196	263.44	357	123	0.257	-1.959	5.61539e-05	0.00922946	0.0943	0.0753
ZMAT1	499	627	788	84	431	558	703	723	77	417	495.51	661	247	0.256	-1.967	0.000278935	0.0249465	0.1129	0.066
ZNF397	535	642	619	77	276	598	720	568	71	267	444.64	629	169	0.218	-2.195	2.87282e-05	0.00666111	0.106	0.0662
ZNF462	1186	1201	1453	214	828	1326	1347	1333	196	801	1000.46	1335	498	0.298	-1.747	0.000681809	0.041062	0.1073	0.0733
ZNF608	1445	1669	1868	136	1058	1615	1871	1714	125	1023	1269.61	1733	574	0.202	-2.31	0.000630688	0.0397019	0.1595	0.0774
ZNF638	1524	1531	1835	140	847	1703	1716	1683	129	819	1210.19	1701	474	0.193	-2.375	9.12809e-05	0.0126899	0.1358	0.0766
ZNF790	66	37	64	1	23	74	41	59	1	22	39.42	58	12	0.155	-2.69	0.000630144	0.0397019	0.1945	0.1296
ZNF808	22	27	32	0	10	25	30	29	0	10	18.78	28	5	0.121	-3.051	0.000966912	0.0478434	0.2438	0.1802
